# Supplementary material
Source: publisher figshare collection journal article supplement (https://springernature.figshare.com/ndownloader/files/16847279)
Supplement: Supplementary file 1 [file 16847279]

## Sheet: Supplementary Table 2
Accession	Peptide count	Unique peptides	Confidence score	Protein name	Gene name	Normalized abundance per sample
						PC2978	PC874	PC977	PC1074	PC1256	PC1346	PC1385	PC1197	PC2067	PC2234	PC2313	PC556	PC1247	PC1595	PC1613	PC890	PC515	PC962	PC1081	PC1789	PC1794	PC2070	PC2099	PC2170	PC2797	PC490	PC1084	PC1652	PC707	PC775	PC1293	PC1777	PC1978	PC2209	PC2355	PC1090	PC1188	PC452	PC458	PC639	PC1189	PC1336	PC1437	PC1222
Q92496	6	2	35.6338	Complement factor H-related protein 4	CFHR4	1859.88	305.906	1486.15	671.888	1193.98	124.786	892.644	913.639	358.871	655.713	954.227	1477.61	1056.92	746.843	235.304	1064.47	236.043	141.903	556.895	307.451	482.892	821.28	363.498	320.302	56.2058	644.54	310.048	280.798	77.122	461.081	506.109	344.754	335.12	498.911	871.227	185.273	343.776	243.741	182.025	1282.23	981.517	179.476	346.423	405.435
Q03591	15	2	131.59	Complement factor H-related protein 1	CFHR1	190.433	1506.55	643.486	424.258	1611.9	631.909	1211.02	489.817	362.567	1111.53	974.007	494.663	1971.65	480.155	1007.91	817.979	420.9	390.615	1382.61	1773.28	738.84	709.215	845.886	1528.73	517.263	4464.33	408.103	526.293	376.736	1973.91	418.031	702.388	780.715	234.658	782.59	866.527	813.259	1071.38	591.707	1391.41	483.026	467.974	659.489	335.691
P55285	3	2	17.7723	Cadherin-6	CDH6	864.099	19.9855	253.785	220.328	241.825	163.675	320.465	788.767	171.139	91.6118	77.4198	145.452	28.0976	13.4172	173.223	19.3009	106.256	26.8851	311.52	34.3618	152.143	236.874	0.846605	6.68287	45.0608	71.5193	74.7073	52.7869	135.077	57.0315	219.326	27.1047	0	11.7624	197.023	41.9062	21.6672	49.4191	4.77564	388.524	434.196	7.32177	78.759	366.442
P08779;P02533	3	2	15.4726	Keratin_ type I cyt keletal 16	KRT16	1709.09	5173.36	1778.09	2861.68	3036.75	4029.85	2571.25	2473.77	2512.39	803.079	2321.86	2074.06	4567.89	2886.42	2378.31	319.525	2500.48	2375.06	606.806	2027.87	1411.34	978.269	4540.45	1514.91	4616.12	3608.74	1136.58	470.367	1660.48	144.168	1533.96	1551.2	1844.11	2892.19	2469.13	2113.1	1238.29	2360.82	2205.43	1476.81	1325.21	3302.78	2910.79	2140.35
O60437	5	2	26.3474	Periplakin	PPL	493.78	6159.02	1124.11	4759.98	4006.53	8235.88	2309.12	971.316	2040.66	2703.83	1357.49	1878.73	9859.38	6521.13	4427.51	416.63	1888.41	6034.09	197.217	2896.52	1096.56	1027.16	6212.69	3155.19	6248.23	993.205	975.231	1407.78	2491.39	335.882	1294.5	2791.41	6219.04	5702.28	1990.41	4644.61	2408.78	5217.71	5772.96	553.663	363.041	4527.21	3723.6	857.1
A0ZSE6	3	2	8.5808	Cell cycle control protein 50C	TMEM30CP	41939.9	7284.82	11255.1	5025.19	4057.31	2955.38	9529.41	19103.5	7510.26	8123.99	7585.17	17259.3	2025.81	3193.53	3441.51	22150.8	5773.7	4636.19	26816.2	4533.1	12679.2	15086.8	2462.49	3473.13	3911.67	5932.71	12017.9	7723.96	7400.67	32437.4	12413.9	6192.03	2189.39	4806.71	8832.92	4110.94	4551.64	3597.38	5390.47	13110.7	16635.1	2337.43	5278.14	14115.1
P35527	6	5	28.6738	Keratin_ type I cyt keletal 9	KRT9	4457.99	3889.66	2397.79	1686.87	2135.69	2462.39	2193.63	3004.2	2140.99	2187.72	1689.3	4816.83	1653.34	1546.04	1903.65	2222.16	3253.89	2637.93	3150.85	1551.39	2275.05	5049.61	2027.33	1883.82	1528.34	1187.41	1250.92	1361.68	6870.19	18339.1	2893.92	2161.25	1506.73	2611.55	2605.66	1295.28	2154.35	1182.78	2663.42	1849.85	1646.76	1339.71	1296.68	1489.66
P59047	4	3	21.7636	NACHT_ LRR and PYD domains-containing protein 5	NLRP5	9389.46	6096.83	6315.78	6434.24	6262.4	7363.41	3139.13	5691.77	2012.73	6972.82	9620.39	4057.68	1360.63	3647.62	4063.48	6514.5	4148.34	3019.68	8289.65	7144.71	8235.34	5736.12	2789.21	10325.9	3475.33	2680.5	8521.63	6734.3	2778.5	12150.3	4329.04	3709.56	2509.84	6555.9	7523.31	3701.29	9165.22	2860.83	3863.78	14028.4	2570.96	3923.11	4386.19	8656.2
P13645;Q7Z3Y7;Q7Z3Y8;Q7Z3Y9;Q7Z3Z0	6	5	36.0366	Keratin_ type I cyt keletal 10	KRT10	12165	48466.8	15439.9	22390.4	22283.1	18060.5	25511.9	13918.4	19195.5	4749.15	4480.42	22539	6514.97	18438.1	19562.9	6641.89	10062.6	15072.3	11815	9258.52	25865.8	17345.3	21438.6	21492.5	17610.3	24470.9	17415.9	20251.8	16186.3	10157.8	16314.1	21697.6	35062.3	35293.2	24992.8	12944.7	15193.1	18566.3	13228	34167.5	8452.8	16135.8	11890.4	12481.6
Q92698	3	2	16.4696	DNA repair and recombination protein RAD54-like	RAD54L	3683.17	5644.91	2498.46	4874.77	5043.71	7726.25	3095.65	2023.68	3958.86	2042.79	3210.67	2655.5	8936.06	6723.28	5377.29	1057.26	2971.22	4300.08	1839.49	3682.8	2529.58	2184.83	6786.57	4833.26	5793.41	3161.7	2752.44	3262.25	4080.34	908.58	3070.18	4087	8564.31	6028	3553.63	5786.97	4461.53	8045.02	4500.31	3056.81	1781.69	6623.66	5685.12	2467.72
P0DJI8	19	9	130.555	Serum amyloid A-1 protein	SAA1	2753.33	2869.74	13900.9	1717.19	1597.62	1960.95	1913.81	14080.7	1962.15	6171.02	2263.14	1557.32	1687.08	1671.43	2055.01	14681.3	557.881	1296.59	5009.98	2298.4	40112.7	1234.21	1654.47	5028.11	1627.13	652.637	5500.41	53178.1	2162.55	78335.3	1233.03	1330.07	1501.59	2011.87	3568.1	1468.75	1197.42	1219.55	1615.75	8980.12	1258.46	1291.65	1119.47	1255.54
P04264	7	2	39.0292	Keratin_ type II cyt keletal 1	KRT1	1056.26	3470.42	2031.38	2737.57	4143.92	4799.63	9021.58	996.856	1330.8	2718.49	5074.33	16185	11542.7	3801.54	1723.24	1491.04	4481.19	6273.82	1429.97	2938.32	1437.92	9767.56	9229.23	3945.97	3338.66	5230.64	1459.32	3357.04	27678.8	1100.06	2001.01	6882.96	51038.5	24047.8	5209.59	2113.06	3891.66	1643.56	1940.97	1848.18	2802.55	3731.37	1437.9	829.493
Q9Y6X9	5	3	27.0718	MORC family CW-type zinc finger protein 2	MORC2	2637.81	126.541	561.644	172.994	223.133	107.026	5431.48	792.351	556.364	627.476	265.212	2984.62	28.9984	12236.7	288.62	9428.76	5210.94	7710.78	7845.68	6084.98	5063.33	3733.45	7166.97	6195.5	8918.54	7033.22	4652.05	5270.65	5561.12	5164.18	3996.32	4612.77	7072.89	6583.44	5529.12	9825.44	6893.14	9701.22	8526.96	7438.81	3698.7	6665.95	7652.97	5319.92
P00746	3	2	12.0111	Complement factor D	CFD	1112.15	2758.01	877.063	2099.37	1630.93	2042.19	1414.58	859.369	1235.45	1020.66	1264.85	953.044	1715.88	1514.9	1521.83	281.233	1108.17	1254.76	601.864	1424.79	699.502	664.094	1536.5	1615.4	1090.5	850.499	1027.28	1046.07	1040.48	336.893	941.529	1147.51	1589.98	1600.8	1279.66	1108.85	1268.36	1668.1	1545.35	1256.12	728.344	1329.35	1147.7	970.605
Q86UX7	7	2	37.3379	Fermitin family homolog 3	FERMT3	1744.35	2140.69	1354.85	1883.7	560.702	1310.63	1011.01	893.713	572.849	3987.67	2777.36	718.822	3607.22	1577.89	949.494	1679.87	1695.21	1495.27	2801.24	1992.79	1295.52	1295.92	646.316	1915.27	1382.31	413.018	1307.88	426.842	1009.94	2294.98	1121.61	993.21	638.019	4086.33	1030.2	1918.19	2019.78	732.27	1174.87	1251.96	532.64	708.406	2471.61	639.986
Q8IZU8	4	2	25.4689	Dermatan-sulfate epimerase-like protein	DSEL	8196.49	13775.4	4329.65	8892.12	19251.2	14597.2	4881.71	17459.6	22557.4	5395.38	8311.18	6879.27	11219.2	15290.4	9576.16	378.069	14152.1	7531.55	1574.11	6575.48	1483.38	4681.61	42187.6	9184.48	11013.6	4180.37	2361.59	3819.52	5184.29	184.201	6229.17	7763.69	86310.3	14099.4	14876.1	14366.6	10361	8760.52	16153.8	2041.59	3847.74	19655.6	5023.09	18317.6
P32456	9	2	53.7199	Guanylate-binding protein 2	GBP2	884.833	1233.15	1365.16	1815.81	2903.89	2236.31	1231.16	763.391	1904.62	686.277	872.832	549.627	1707.29	1489.89	1399.83	511.428	539.822	327.551	109.884	894.711	648.619	619.962	2511.77	1429.07	2276.53	507.649	615.917	778.599	604.514	13.5478	1015.29	1752	4917.56	1241.21	1377.61	1692.2	812.547	1955.88	4633.18	918.758	1081.61	2172.58	1710.67	542.405
Q96PZ0	3	2	20.9594	Pseudouridylate synthase 7 homolog	PUS7	6138.58	10012.6	2607.54	3210.74	6426.26	5897.02	3323.62	7475.34	5174.92	3224.61	1911.37	3892.71	4773.37	4262.62	4361.05	980.803	3351.05	4638.31	3471.27	14729.5	1399.93	2490.85	9029.44	3166.54	4896.06	4535.91	1506.09	2674.81	2830.48	2014.57	3544.22	2581.89	11012.3	6541.26	4029.02	4830.59	3449.16	5730.13	5684.98	2262.01	3906.34	4189.38	2980.44	4865.57
G9CGD6;Q8WWN9;Q96H79	4	2	19.4325	CNK3/IPCEF1 fusion protein	CNK3/IPCEF1	4302.05	4004.05	2543.42	3978.69	11070.2	9509.4	6700.32	4565.18	12472	4159.17	2427.98	3752.07	8694.6	5950.62	12003.3	991.405	19104.9	4467.16	1145.95	8861.42	2333.49	2994.52	8224.06	7008.22	5469.63	3529.47	2855.06	3127.58	8020.03	725.75	5504.43	13820.5	5066.56	4631.37	4361.28	5196.15	10052.4	8922.42	12595.5	3107.07	2300.86	9409.19	11286.1	3041.6
H3BMM5	3	2	13.7361	Uncharacterized protein		28219.3	23252.7	31522.9	24162.4	38673.5	31335.5	33017	23569.5	31088.9	17788.4	20506.2	22190.9	19510.9	23061.6	25203.6	10841.6	13099.9	16511.6	17994.3	18314.2	19067.1	22220.6	24571.8	23703.2	15528.1	17808.7	20454	20267.5	15878.8	10590	18378.6	24614.9	31920.1	19590.4	23010.2	26283.8	17277.1	23776.5	29527.6	22042.1	41855.1	19625.6	26150	18003.5
Q15166	6	2	62.1348	Serum paraoxonase/lactonase 3	PON3	1612.11	87933.7	27009	79556.4	60744	108502	5161.74	47974.7	63358.3	44089.5	48690.5	50143.6	70733.8	14998.3	94155	1399.96	2577.93	8490.5	1861.46	4754.92	6583.59	3843.09	9738.53	9630.51	6622.18	3374.06	2511.51	5083.04	3357.35	1122	2693.23	2623.67	8836.65	9579.01	3623.64	5977.45	4023.37	8982.57	5069.87	4908.59	1947.22	12963.1	9228.09	2935.48
Q01432	3	2	14.4868	AMP deaminase 3	AMPD3	4070.34	6946.23	2637.72	4565.07	5153.57	2328.26	7975.61	27140.5	13336.9	6990	6665.15	6560.55	789.749	2872.33	3394.98	1151.47	7100.86	2648.88	3162.23	1885.59	1787.36	3451.3	5253.58	2710.23	2636.03	4734.72	3629.08	4404.27	4680.27	1849.56	5731.28	3414.95	5421.26	3941.65	13693.4	2231.87	5811.98	2932.94	2018.32	5884.24	3915.49	2109.46	1967.97	11691.8
O00219	2	2	5.4092	Hyaluronan synthase 3	HAS3	6814.03	18478.6	5072.08	21052.5	23422	28285.7	4272.42	2685.68	7641.39	10036.3	3248.62	6652.03	26590.3	17165.4	19435.2	2209.52	5807.89	13352	3172.32	10637.8	4353.81	7802.17	30658.7	10417.4	22965.8	5001.44	3507.68	4301.08	3988.18	4866.13	5775.91	9794.62	35474.6	17816.4	9104.56	25657	7097.9	20218	21450.2	5060.18	3879.96	24136.9	15604.9	3173.83
Q9ULC5	5	3	23.0194	Long-chain-fatty-acid--CoA ligase 5	ACSL5	16981.6	12284.8	16324.3	10086.1	12300.5	9238.48	12279.8	16585.3	13045.9	15364.6	25446.3	17830.2	8965.24	10170.1	10532.2	19632.8	10770.3	12633.5	15629.1	13959.5	15635.1	14915.2	7240.87	17327.1	7955.73	9546.43	12510.2	11251.6	9034.44	15167.8	8480.42	8792.56	6324.04	10605.1	11687.2	9200.73	11104.6	8086.35	9413.78	13531.2	11771.7	6588.92	7159.6	11798.3
P07737	5	4	30.7461	Profilin-1	PFN1	5857.27	2319.99	2724.53	4832.27	1979.79	4275.98	2307.62	1284.61	1313.14	12409.8	8538.94	1231.51	10989.6	2867.21	2783.48	1042.48	4574.19	4167.9	916.372	6722.25	2309.58	1574.44	1067.61	4369.74	3044.11	808.325	3771.45	831.118	3107.27	7009.86	3456.59	4685.36	3112.51	15104.5	3439.11	7595.86	6115.37	1866.7	3880.84	3544.92	3712.75	1259.09	8873.04	1772.35
Q8N841	6	2	26.8755	Tubulin polyglutamylase TTLL6	TTLL6	232982	17886	67037.7	24169.5	22546	21670.9	39106.8	34829.9	35093.4	25618.6	22120.8	93129	18677.4	32753.3	21514.6	145361	37772.9	34264.6	108758	36241.9	41721	88673.6	14960	17121.7	33105	33236.5	53066.1	36882.4	32610.8	179007	50043.1	25930.1	13784.4	21327.2	28663.5	35407	23326.3	19841.9	54031.9	33093.6	71348.4	14694.5	63480.5	66737.9
P0DJI9	11	2	102.984	Serum amyloid A-2 protein	SAA2	390.027	633.552	804.396	293.294	175.076	109.837	300.721	916.533	271.034	609.913	394.093	318.499	123.718	127.555	594.696	5505.51	188.292	223.723	297.632	323.058	3320.52	267.094	91.7788	502.339	152.988	193.102	546.641	3315.2	198.478	11044.6	245.311	182.586	86.7471	168.086	256.01	140.114	228.846	113.002	123.386	654.886	195.706	179.356	201.706	243.849
Q9P2E3	9	2	55.7965	NFX1-type zinc finger-containing protein 1	ZNFX1	32881.2	85653.7	32120.9	68878.7	58803.3	132559	38396.6	30600.4	16402.2	33457.7	28982.4	6872.62	12875.3	56592.1	63769.4	9482.69	29740.1	44492.8	16687.8	9951.24	18986.1	13108.1	71307.6	47575.7	50271.6	31199.4	15569.9	21507	22930.5	9482.41	36565.6	42430.2	78665.7	70711	24498.9	54351	48869.3	94013.2	76698.9	35539	15410.2	37336	46163.6	28320.4
P0C0L5	163	2	1938.05	Complement C4-B	C4B	7797.09	19757.9	5519.96	9794.49	11183.1	21392	8782.71	5183.99	5610.98	7791.69	12125.8	5761.32	48774.9	41030.7	18825.2	5541.58	6659.25	22587.7	3990.43	20901.2	5757.38	5672.55	24368.1	16076.7	24217.8	6330.36	4744.47	6501.66	6827.61	4293.61	4668.34	8798.03	30194.6	32325.7	7165.11	22656.5	8692.7	28192.1	20103.6	5856.29	4368.67	31418.8	16165	4727.7
P11177	4	2	17.2519	Pyruvate dehydrogenase E1 component subunit beta_ mitochondrial	PDHB	3975.06	8068.07	6516.72	9094.33	3855.51	7077.84	4846.81	2608.43	3327.94	4468.48	2868.94	4076.52	5099.42	4356.53	3898.6	2972.93	6748	1995.45	4710.29	2681.25	3189.52	12581	10915.3	2873.49	7421.18	3973.73	3371.33	4662.1	3263.29	2133.76	2471.35	14939.4	6782.52	3374.2	3214.93	5466.56	5910.43	8065.91	8777.47	6652.21	4715.58	5820.27	3824.99	4145.66
Q9NR63	4	2	25.7947	Cytochrome P450 26B1	CYP26B1	29940.6	2440.34	6160.83	4338.77	1985.07	1676.85	7537.49	7183.13	5149.38	4737.34	3080.26	16405	1095.85	1531.05	2171.25	9124.39	2451.75	1536.96	5540.8	2558.71	8181.31	11004	1520.05	1273.3	1761.72	4533.7	3941.56	3542.51	1463.64	7136.69	5216.58	1816.93	1817.41	2276.93	7121.56	1192.79	2437.85	1844.83	1099.81	11351.2	12368.9	1550.11	2324.16	2717.52
Q5TZA2;Q96RG2;P0C5J1;Q8N7N1	7	3	30.1258	Rootletin	CROCC	5295.92	24501.6	7642.95	18296.1	20534.6	27671.2	16820.9	6919.81	12182.7	11639	11893.2	8695.93	24103.4	20175.1	17239.4	2400.01	5454	18118.8	2050.81	12998.8	9543.63	4706.25	26159	12044.4	16855.1	11055.5	8376.16	9570.61	13912.2	1774.98	13398.5	17274.3	25334.4	16315.4	12132.8	19261	11461.8	20443.3	13162.6	6345.78	3290.16	15426.4	12292.3	4730.76
Q5JYT7;Q96HE7	5	2	24.2631	Uncharacterized protein KIAA1755	KIAA1755	13086.3	25585.5	12277.3	15351.9	14189.8	19483.6	15608.9	15752.2	13069.9	12579.1	12654.4	11353.1	16611.5	15507.2	16646	10006.6	12802.4	14641.9	11169.6	12861.3	12094	11751	18066.9	13729.8	14823.5	12529.7	9861.03	11057.4	14221	11340.9	14025.1	11532	16450.2	16657.3	19421.4	13462.3	15698.3	14288.1	14400.4	18135	7769.1	14641.2	13678.9	13030.1
Q9UIF8	4	2	19.5275	Bromodomain adjacent to zinc finger domain protein 2B	BAZ2B	52425.9	32648	22169.4	24809.2	22368.8	30914.9	17949.9	18709.6	9075.95	9924.57	8260.96	22987.2	12509.7	17295.4	15793.6	38303.1	11414.3	22823.5	44764.4	9287.87	10879	20699.6	21517.8	9442.51	23177.1	8015.39	12653.6	12219.7	16084.5	35566.8	18883.3	9027.99	14218.8	21440	15687.2	15402.8	17167	17336.7	22703.4	12979.9	16550.5	17525.7	13288	15871.8
Q13474	5	2	24.8127	Dystrophin-related protein 2	DRP2	5764.98	42723.7	12646.4	24519.6	26940.4	35065.6	24298.2	20125.4	36796.3	25382.9	33286.5	28846.5	123586	46096.3	31295.8	12645.4	14543	45507.1	11684.9	84169.1	10660.1	14772.2	31684.5	45378.4	20731.4	12056.4	12329.5	16874.4	24344	15293.9	9587.18	12443.7	18786.1	28021.5	16120.6	23761.7	19024.2	27723.8	14421.2	19662.6	7091.36	33072.3	30215.8	10634.8
Q9H0R5	3	2	15.1626	Guanylate-binding protein 3	GBP3	9144.19	10012.4	15109.7	17418.1	10936.1	9796.12	13208.7	7921.72	13975.4	8873.87	10523.5	21001.1	3301.81	7850.47	9419.28	27392.1	7389.74	4301.91	35474.2	7042.48	18491.1	20942.9	12058.9	7391.68	8492.33	12682.4	15063.4	8586.7	9322.11	24956.8	16827.4	12184.3	8460.2	8053.03	19535.6	11186.4	6266.51	10077.7	11507.7	11001.5	23513.1	7106.6	8815.16	16656.4
B1AJZ9	10	3	49.0439	Forkhead-associated domain-containing protein 1	FHAD1	61583.7	29436.7	17526.6	31820	20954.9	13743.3	53464.3	33956.1	17113.4	17471.7	23534	35962.8	7675.15	27495.9	14313.1	31960.8	15204.4	13823.4	29252.4	15219.5	27045	21829.5	13600.4	12880	16650.9	53862.4	17465.4	18859.4	18431.5	28218.1	41746.2	30707.3	20225.9	11936.8	21341.3	15978.6	19558.3	13463.9	14741.5	30993.5	15088	12947.6	16475.2	6613.4
O95996	10	4	54.4347	Adenomatous polyp is coli protein 2	APC2	17657.9	83683.6	17328.7	66078.9	50058.5	77318.7	28640.4	15070.5	29507.9	30183.6	22908.1	18060.9	96608.7	74291	56619.4	9343.59	28057.5	48758.1	10703.9	36212.2	13146	15626	74270.7	30189.6	85316.7	25187.9	13951.9	17858.4	18549.1	8327.56	20895.9	24541.9	78022.1	41627.2	23552.6	45572.6	31085.3	60027.2	65541.7	23061.8	15400.8	65322.9	34009.5	12856.2
Q92777	5	3	27.1092	Synapsin-2	SYN2	7884.61	52472.2	14226	12693.5	21559	19383.7	8812.12	16281.4	9127.31	18052.2	48327.2	11236.5	24671.7	18680.5	16547.4	11588.9	4697.48	9873.84	25297.6	10819.7	15078.8	15917.1	16154.5	15363.4	14463.3	6688.55	17050.4	11714.4	11287.5	11557.5	9573.95	6133.53	16377.5	11059.2	11054.2	13161.7	20909.4	22188.3	14223.3	6218	7296.84	20921.5	18993	12182.4
Q9Y4B5	4	2	19.0706	Microtubule cr s-linking factor 1	MTCL1	5723.59	7801.41	6618.88	7933.78	3299.81	3391.21	9546.15	4989.99	9648.69	4306.51	5861.53	3387.89	884.724	1712.3	3084.55	1799.28	6946.9	3160.77	2598.23	2231.57	5953.36	4693.06	1673.11	3267.92	1680.99	4921.3	5031.22	4269.44	5590.02	929.334	6723.42	5256.54	1200.23	1970.06	9029.71	2408.5	3958.38	2042.84	2373.23	6521.16	3844.57	1302.21	2637.03	7179.3
P02656	26	22	148.204	Apolipoprotein C-III	APOC3	278192	462676	260865	598965	477821	466698	497284	249089	281068	316608	204794	371685	406944	360246	388738	192407	457752	243513	254922	199319	154973	127457	430797	249168	406845	299445	161441	133841	274891	99711.8	228626	237303	662637	422770	252247	507647	263782	358764	666256	372140	299321	351572	272772	314355
P0C0L4	254	81	1897.93	Complement C4-A	C4A	178978	409911	200337	304541	204981	329456	268005	132328	169197	99575.5	159115	170116	469841	444073	405474	112199	177746	284222	126276	458721	102129	119729	419400	230545	303822	152066	143434	175846	298852	120261	211686	221822	537684	497347	281939	212607	203802	413273	322983	140403	90399.5	304556	206606	149670
P48740	9	2	54.0123	Mannan-binding lectin serine protease 1	MASP1	13835.6	45922.7	13447.9	51965.7	23012.9	56489.2	20769.4	11628.8	25536.8	23758.3	17064.9	21884	43281.6	36595.9	43949.1	5616.55	18545.2	26534.2	5736.82	23030.3	8356.64	7751.51	67514.6	18413.2	45604.3	22083.9	7518.35	10626.1	8501.48	3574	21115.4	34850.1	78924.2	32919.7	31059.8	44142.8	16599.5	32543.1	35091.6	18477.3	12894.9	45395	26388.8	8585.52
H7BZ55	9	6	52.9472	Putative ciliary rootlet coiled-coil protein 2	CROCC2	167990	205841	96299.4	158495	176427	211223	136380	115069	111637	108209	81947.1	125154	104541	122179	143746	105402	96718.6	87659.2	97707.8	86436.8	86308.7	81576	141505	99525.3	110607	86246.5	77182.7	80851.8	90520.2	84705	91233.1	97575.5	177371	122869	106069	125832	81084.8	115898	142443	112366	93249.7	113571	107407	100721
Q8IWC1	7	3	39.6792	MAP7 domain-containing protein 3	MAP7D3	7463.57	5359.08	8977.72	6968.58	9403.21	7307.39	6196.52	5676.22	8584.52	6026.08	7744.18	5081.93	3117.21	4326.11	5729.28	3007.43	3446.14	2702.21	4474.72	7603.75	5568.47	5519.58	5029.71	10311	3096.41	8316.6	5730.2	6762.38	4033.2	2239.07	5567.71	5714.77	6116.33	4517.77	6875.99	4685.12	5629.63	4947.08	5462.92	10534.9	10270.6	5014.24	6579.42	5388.89
P61626	5	4	24.01	Lysozyme C	LYZ	8315.85	5923	2876.1	5016.97	6386.96	3852.58	5293.47	5576.35	5546.73	3409.76	4629.99	4755.86	1397.26	3576.53	4985.05	4060.61	6926.63	2097.01	3994.12	2356.08	4232.11	3169.18	10765.8	4886.89	2425.14	3938.62	4578.16	3614.14	4602.44	3694.42	4558.9	5621.85	17354	3282.89	5580.56	4352.82	3598.13	2489.95	4384.58	3875.22	2522.09	5424.74	3003.6	5561.59
Q9UPU9	6	2	32.8894	Protein Smaug homolog 1	SAMD4A	7799.83	2982.21	7375.5	23988.3	19622.4	18521.7	9920.27	5269.2	16051	10857.8	3661.1	12786.9	18310.3	13741.6	17586.6	3584.97	8445.7	10973.3	3719.22	12545.3	8033.02	8122.62	26912.8	10093	18382.2	11964.8	6109.55	9051.64	6735.35	3280.43	10529.2	14821	29295.6	17667.4	16477.9	24655.9	7241.37	15538.2	15294.9	11196.2	8112.64	18950.4	16281.6	7328.2
P27918	9	8	57.4193	Properdin	CFP	65927.4	137312	45563	82952.9	76336.3	139426	58958	60837	42052.6	65990.3	85806.5	44755.2	213874	137529	96581.9	80897	33290.4	158821	86768.3	186296	57199.8	60043.8	88990.6	190466	71988.8	46383.9	47332.9	44086.1	41294.9	79902.9	39262.2	38267.2	58354	113603	47609.7	81377.2	76545.6	107047	63146.9	60781.3	30021.8	112519	76500.5	39537.1
Q12805	9	8	51.6884	EGF-containing fibulin-like extracellular matrix protein 1	EFEMP1	17085.7	14668.1	11338.1	23249.4	18936.1	18024.1	15861	14155	12442.2	13145.6	10663.4	13945.1	11429	8225.67	20358.6	18943.2	16531.2	11230.2	9300.75	14682.5	8805.7	9862.49	11610.1	10997.5	9697.22	7956.93	15539.3	10779.2	12398.3	9993.6	12828.6	15245.6	9247.15	9610.26	9953.84	11443.1	10987.2	11141.6	13547.9	10396.4	7983.54	10501.9	12198.7	9767.64
O60870	5	2	22.619	DNA/RNA-binding protein KIN17	KIN	67837	371918	124274	280566	218950	267200	175637	112820	110638	106548	77312.7	89366.2	243344	264890	202981	41565.5	33880.7	166970	49058.5	155550	166753	82187.2	228832	82354.3	205053	97124.4	88817.6	106790	158968	41667.2	102274	134404	193141	199911	132570	130371	109508	283942	214229	117610	48870.9	185131	195405	81434.6
Q96G01	8	4	39.9721	Protein bicaudal D homolog 1	BICD1	12728.7	19013.9	8039.64	14582.6	16573.4	20348.5	10602.5	10691.7	12625.7	12067	14869.1	10561.4	27594	22014.2	15653.5	9754.18	10508	19301.4	12729.2	22393.5	9394.94	9721.5	22530.4	17691.7	14743.7	10140.1	7834.72	8869.39	11325.4	10278.5	9175.21	9619.63	37342.7	22967.1	11250.2	14064.5	12455.9	15577	17178.3	10516.5	5752.47	17683.7	11315.2	8496.05
P32856	4	3	22.4889	Syntaxin-2	STX2	31668	42186.3	17825.1	34439.7	34042.1	58229.8	25448.5	14891.9	28595	25719.7	27112.8	19460.6	90948.2	62487.4	34200.5	20910.3	23321	47704.6	23872.3	31017.2	14889.3	17869.3	40183.3	27898.9	30067.1	18847.4	21401	19509.3	20827.5	15666	15469.8	29315.6	30953.4	32175.4	20206.5	26378.8	23908.9	35857.3	30443.3	16772.4	16144.3	33250	29281.1	17952.5
Q9UIC8	2	2	9.3361	Leucine carboxyl methyltransferase 1	LCMT1	2633.29	10106.4	9482.15	6863.23	6372.19	9060.75	7817.46	3923.77	13091.1	5323.63	10406.9	17754.2	14061.1	15288.5	8472.72	12388	3782.53	11034.8	6126.88	36769.5	8813.7	10986	5635.72	5534.44	10288.5	4428.27	11229.9	12916	7405.85	9191.73	2198.03	3067.32	2114.51	2856.88	5760.94	7289.08	3880.69	3869.42	4384.35	5621.83	5172.5	2258.23	2982.27	6037.65
Q6UB98	6	2	36.5713	Ankyrin repeat domain-containing protein 12	ANKRD12	171470	294756	107155	118626	118680	209291	180364	142942	112084	122736	198106	126730	172303	137401	102647	131346	99334.3	97236.7	128566	67858.9	110444	119503	93621.7	118492	61311.5	107182	101424	84980.8	93637.8	121121	108451	86973.3	92531	75579.5	113443	100812	144863	133586	102775	132008	83148.5	136494	135552	74655.3
Q6IEE8	4	2	22.5335	Schlafen family member 12-like	SLFN12L	4084.23	4951.15	5834.63	3872.01	6229.46	1306.89	4853.57	6236.74	4475.23	3173.62	4681.33	6226.49	1014.76	5070.11	3426.17	2166.59	2722.64	4786.53	4194.51	4246.96	6934.13	7242.72	4710.82	7284.93	4452.01	3417.89	5963.9	7487.41	3830.28	3033.87	5074.8	5399.98	4006.62	6399.78	7497.48	5015.29	3432.25	5034.28	5229.24	8909.28	8721.58	3858.31	3597.99	5448.42
Q7Z3Z4	6	3	29.4066	Piwi-like protein 4	PIWIL4	2969.22	20817.4	5678.36	17512.4	13134.4	20812.1	8344.39	6517.88	12740.7	7180.4	8980.46	8257.24	11754.4	15705	12682.7	2043.83	3963.4	7875.49	2332.08	11664.3	3879.27	2527.88	11407.4	3324.86	9275.66	2989.75	4349.13	5979.47	8316.82	2434.47	2942.46	3963.11	7733.21	5041.55	5157.94	7296.34	8764.5	7534.59	6683.58	5521.04	3442.1	6715.78	5330.55	4108.46
P06276	7	6	37.1394	Cholinesterase	BCHE	33421.3	83558.4	24383.4	80641.5	125077	66107.8	27155.3	14948.2	32898.2	32415.6	23487.5	26492.7	114400	87259.9	77811.2	20477.3	29816.8	56123	18719.2	40343.6	17990.3	25980.5	124810	30074.4	115889	52611.5	18757.3	19193.5	23679.2	16741.3	25872.4	34259.2	148835	71552.8	36871.5	57855.2	37180.8	98337.6	100453	17388.6	29984.3	120918	93554.2	11725.6
Q3V6T2	15	6	70.1168	Girdin	CCDC88A	58657.8	28899.6	26967.2	20421	19724.3	31740.1	15688.5	17765.8	19092.7	16969.6	16659.2	24117.6	23213.7	27891.7	18125.4	16750.1	16458.8	39841.1	28384.9	20073.6	12210.4	21478.1	19394.6	14679.4	29342.1	9193.88	23160.3	15640.1	20628.5	42919	17159.7	19532.3	10177.4	19092.4	20590.7	15914.2	20400.5	18121.3	35339.7	23794.1	28728	13626.2	20629.4	29422.7
P68871;P69891;P69892	15	8	119.198	Hemoglobin subunit beta	HBB	63919	35255.5	24420.8	17112.2	28950.1	42865	18067.8	20654.5	33070.2	15437.1	15269.4	27029.3	26683.2	32576.5	8836.93	79835.1	22188.9	4852.98	66757.1	11036	19566	34504.1	6672.51	9154.72	7306.68	18107.4	32291.8	26321.6	17712.5	77533.9	21362.6	28110.4	19315.3	40942.2	70326.8	14390.6	14324.5	23925.7	108808	25743.1	22216.6	22010.2	24849	16558.5
P43220	3	2	15.1217	Glucagon-like peptide 1 receptor	GLP1R	15407.2	5221.48	4210.03	5246.57	4530.64	5235.12	44364.3	11342.3	13822.5	10374.3	18099.8	3907.95	6158.57	3439.34	7553.55	19670.5	8300.1	23488.3	10916.9	16252.2	30551.8	14831.4	15424.1	18089.4	14804.4	9538.35	14710.5	16376.9	17797.5	8100.63	11724.6	14758.3	8671.09	14139.7	24536.3	12198.4	12147.7	15498	12751.7	22275.7	8142.65	9405.83	12834.5	20898.9
P55056	11	5	68.5636	Apolipoprotein C-IV	APOC4	4262.9	15068.7	3957.87	10375.3	12245.4	18922.1	9534.88	6330.36	6893.45	8360.74	9679.36	7132.2	23731.2	14654.6	9775.7	3242.34	4361.87	9316.37	4194.57	6938.35	5012.36	3142.32	14435.6	10125.6	9212.42	5169.63	3663.19	5392.63	6733.88	1228.41	5239.37	6462.41	13354.4	10820.7	6976.79	9933.29	9266.08	11837.3	12070.8	7075.79	2846.16	13349.5	9369.68	7349.43
Q7Z4L5	8	5	43.4943	Tetratricopeptide repeat protein 21B	TTC21B	29374.6	53268.1	36664	61818	74882.8	64773.7	49027	26953.2	49212.8	33635	33529.8	30521	62219.9	53222.2	59430.2	22720.9	29136	35002.2	17633	37720.9	28249.7	24976.7	63367.1	46375.6	42369.6	33455.5	30641.9	33444.2	31751.3	13804.7	32700	42381.1	69817.4	46257.1	41415.3	60423.6	37681.7	53067.4	51941	32607.8	30793.4	53936.3	54161.9	28847.5
P68032;P62736;P68133;P63267	21	3	208.12	Actin_ alpha cardiac muscle 1	ACTC1	19211.1	84606.1	40294.7	59686.7	56232.5	48216.3	75609.7	23530.3	64743	43088.8	47946	30888.8	17522.7	29967.5	36665.3	9210.16	41971.5	19772.3	14885	22458.9	33057.4	19421.2	38350.1	29423.6	26416.2	48851.9	30621.5	37857.9	42218	14424.7	39958.7	55041.8	36464.1	32204.3	51795.9	24327.8	57500.5	39298.1	24896.6	44545.8	16532.8	25525.7	21692.4	38373.4
P25311	17	14	103.162	Zinc-alpha-2-glycoprotein	AZGP1	138181	220539	97619.8	214842	214082	263032	128623	86001.7	131382	127066	81749.7	130963	216516	183098	202757	55490.3	89064.3	133356	50918.2	110741	83625.6	84728.3	286143	107352	178665	89057.1	67943.5	80448.2	78209.9	60668.9	99382.6	131788	239421	170967	139925	173453	97092.7	198227	193868	120151	75647.1	197161	151029	69161.9
P43251	11	7	75.584	Biotinidase	BTD	33254.8	53844.8	23304.7	51428.9	43147.7	66367.7	39181.8	24926.4	30209.8	23060.5	33869.7	35332.3	38670.5	34547	40621.5	14449.7	19049.8	22802.7	15743.2	26172.2	18316.2	17281.4	41363.9	18874.2	33146.1	28711.1	13753.5	20251.8	25340.6	10250.4	23371.7	27760.6	46346.4	29499.4	26781.2	30395.5	29135.9	41563.2	40111.1	28920.3	14731.8	23446.8	24632.9	14805.4
P36980	9	5	48.0495	Complement factor H-related protein 2	CFHR2	23852.1	29217.7	11829.7	18633.9	24183.1	14674.4	27269	16422.8	16838.1	26581.8	23566.5	12918.3	19623.4	16791.8	14401.1	23927.8	8830.36	5339.41	19559.4	14413.4	16051.5	21590.8	12080.3	21432.6	5660.31	15579.8	11181.5	10708.4	17771.4	32146.6	19811.1	14150.5	10615.3	22536.5	7738.52	10973.4	20032.4	16066	8039.01	25677.2	9642.7	17261.1	12039	16715.2
Q9BXR6	3	2	19.9185	Complement factor H-related protein 5	CFHR5	7181.98	12241.5	4357.89	5293.88	10380.4	8830.62	6208.3	15791	12441.7	7783.06	8928.92	6977.06	7453.83	7466.27	6500.56	4613.32	7911.3	7946.89	6384.03	4357.49	3565.14	4390.01	11307	7636.41	4808.04	4532.73	3400.14	3078.1	5758.83	6328.13	7316.63	4107.45	19408.7	9942.98	6908.07	8476.18	6979.22	6487.52	8677.39	5369.31	3215.49	8560.72	3844	9417.01
Q6UXB8	3	2	15.0375	Peptidase inhibitor 16	PI16	3907.9	29928.8	6263.54	4398.11	8990.85	11893.6	7767.6	11173	6179.29	10398.2	29768.4	3446.82	12414.6	8963.56	5580.62	14671.3	5171.15	4082.77	24777.6	6265.47	11804.7	10458.9	3807.92	12159.3	1559.09	5869.79	9087.7	5425.27	3755.62	14110.4	6348.49	2698.38	2792.36	4364.02	5440.51	4268.45	9064.37	4386.87	5619.41	9152.9	2941.55	6711.39	8238.95	6488.65
O43166	6	2	31.6595	Signal-induced proliferation-associated 1-like protein 1	SIPA1L1	6537.97	12595.9	8130.18	9733.91	9742.49	13654	9052.38	10424.6	8088.49	7766.15	6721.94	5592.56	12039	11462.4	10260.2	3342.66	6077.58	5748.09	2873.75	7115.92	8386.82	6236.12	10078.2	11182.3	5969.36	6051.55	5188	6422.3	7554.45	2624.48	5638.31	6989.17	10170.4	7914.75	6993.08	6978.75	6396.93	10262	7363.25	8726.31	4495.6	9229.04	5845.75	5382.18
P18428	7	5	39.1454	Lipopolysaccharide-binding protein	LBP	4616.22	29258.7	9390.29	11332.6	31746.3	27795.7	6763.19	6354.17	18345.7	11370	22789.5	4832.2	37038.2	24946.1	21380.9	9356.92	8785.54	11532.3	3010.33	24776.8	11331.1	6704.47	28393.3	17143.1	15097.2	12960.7	8244.1	21214.6	13207.4	12114.8	8258.18	3396.52	25900.7	23627.8	17310	10868.8	14805.6	26315.9	25975.3	12092	1707.91	20602.3	24292.1	4646.97
P42336	13	7	66.7218	Ph phatidylin itol 4_5-bisph phate 3-kinase catalytic subunit alpha isoform	PIK3CA	9796.52	50466.5	14744.1	16303	31898.5	37202.5	21688.6	16363.8	10797.7	15605.6	33176	9292.82	41868.1	22717.8	18050.7	69743.1	6600.35	23031.5	41718.5	25342.7	15039.9	18677.9	27539.8	33602.6	22912.9	25863	13696.5	11745.4	15282.1	46449.3	12353.5	10662.1	21982.2	28391.1	13098	18668.5	19116	25438.7	21301.6	14062.5	7095.29	33170.4	27929.6	14327.4
P69905	9	6	73.4951	Hemoglobin subunit alpha	HBA1	27761.1	52688.3	22348.7	25939.7	32835.4	57595.2	19059.9	22636.1	30305.2	16871.1	17192.6	13479.6	44391.2	38845.2	20197.8	11705.8	22500.1	16627	24298.7	17556.7	13927.9	11596.6	19102.3	16167.5	18891.4	19626.6	18172.5	18093.7	17202.6	12903.9	16295.9	23030.8	24145.3	38613.3	53787.4	20884.7	16065	31298.2	95552.8	27962.7	12240.2	26468.8	28321.1	10944.3
A0A096LPE2;P35542;Q09328	25	16	202.025	SAA2-SAA4 readthrough	SAA2-SAA4	93144.7	270275	113310	153764	181335	255101	181850	150973	125833	184049	223828	95636.7	238433	176605	158992	62315.1	74033.1	136634	92432.4	247375	101984	77624.1	132029	147830	94749.9	86470.7	85122.7	103033	139333	59428.2	86989.4	74538.7	131397	109544	140058	127456	131926	133403	108592	179307	63385.4	144447	143223	95095.7
P22792	21	17	188.259	Carboxypeptidase N subunit 2	CPN2	61311.7	235059	82314.3	250212	362360	427696	172956	81066.9	148330	139339	181520	114347	248573	326521	246486	25880.2	129768	195946	32580.3	183657	58002.6	51459.3	283325	196216	181326	103929	63217.9	98523.7	105757	31681.1	90599.8	105778	317751	181263	89749.4	240095	169628	220180	171948	79668.4	53289.3	238029	163793	63832.7
Q8TBZ2	5	2	26.9209	MYCBP-associated protein	MYCBPAP	2159.98	6756.12	2619.05	4747.75	4859.7	10534.3	3277.22	3072.85	4059.44	3089.98	3856.36	2921.59	6519.03	5496.01	4375.51	1775.69	2435.18	4368.56	2973.63	4257.52	3537.06	2869.66	6598.71	4152.91	5146.69	3524.15	2214.73	2691.35	3070.74	2488.15	2764.12	2638.74	7409.71	5423.63	4454.98	4761.95	3495.99	5216.38	5144.18	4416.27	1977.26	6042.18	4415.52	2563.19
P02776;P10720	4	4	35.823	Platelet factor 4	PF4	29520.6	9726.92	11879.6	13715.5	7504.06	11657.6	8781.64	9977.99	8144.72	32964.1	23615.3	9750.81	13185	6968.74	9106.39	10319.4	22887.3	10921.9	8579.45	15294.2	12537.5	6388.72	10219.7	12808.2	5958.88	3442.86	9721.92	3311.26	8530.96	15578.3	14853.6	8710.49	5392.38	19555.7	6540.53	14356.2	15334.2	5553.56	11167.6	12065	7157.06	4508.39	19293.5	14215.6
Q3KQU3	13	3	71.9929	MAP7 domain-containing protein 1	MAP7D1	70434.4	18214	35998	14444.6	14217.4	11054.6	20479.4	26822.5	19862.2	18634.1	22059.5	32386.3	7308.86	13996.6	14928	44382.9	13020.9	16052	43282	10699.8	24713.1	36766.7	7062.57	12982.2	13172.3	9079.97	28452.8	19404.6	9482.72	53137.2	16098.6	12508.4	5688.09	11656.9	15490.2	14328.2	15984.6	10168.8	21715.2	16722.5	45575.7	5606.23	17229	19784.9
P20742	29	10	229.78	Pregnancy zone protein	PZP	12856.1	13165.7	9357.75	48084	22503.3	13251.9	19784.9	10310.1	24089.8	15660.1	12614.5	10879.8	32408.8	24550.2	21018.8	5889.21	7625.9	23695.7	10146.6	17038.4	11848.3	10589.2	17050.2	41446	15199	11057.2	15208.6	23721	20865.5	9817.68	19159.8	12165.8	24509.3	31786.3	15660.2	14238.9	9834.99	37136.2	15071.9	13051.3	8022.35	33159.7	14624.1	22555.1
P00739	28	5	425.625	Haptoglobin-related protein	HPR	65325.6	76024	60225.9	113615	91459.1	144475	66036.5	44030.5	111776	73989.3	61584.7	63883.1	161898	94640.2	131119	32822.9	236974	66590.9	32898.8	178057	40822.2	64704.6	98267.9	75794.4	89325.6	69818.9	59104.2	67195	126888	28717.1	92077.2	92139.1	118507	104693	76141.8	108843	145505	119865	193771	64059.1	45437.5	122383	124553	62715.7
P05455	5	3	28.8647	Lupus La protein	SSB	11622.7	13231	12902.6	14373.6	15512.3	18574.1	13148.4	9194.69	12760.1	9635.24	9977.4	8385.31	15102.7	13364.4	14060.1	6285.84	7772.16	9284.71	9070.55	8797.7	6742.55	7682.73	16284.4	8441.37	14316.3	9591.02	7903.28	9101.17	6905.01	5322.35	10401.2	10878.5	19900.8	11469.6	10569	13017.3	11183.3	13789	17445	10908.7	15713.9	14639.9	10730	7768.69
Q12929	11	7	47.9742	Epidermal growth factor receptor kinase substrate 8	EPS8	47588.4	168955	60345	148194	99082.1	117272	105263	62764.1	86642.3	95709.6	203680	56637.4	69968.6	80101.6	106880	37314.6	51653.7	67797	51259.9	261048	93116.6	71681.2	114209	173542	71558.7	109790	56181.3	87039.9	99971.1	33563.6	74799.7	84604.2	85551.7	88289.3	96425.2	78555.2	86181.3	107657	76921.8	117312	43674.7	94077.5	83727.9	61548.3
Q6IPM2	4	3	14.9345	IQ domain-containing protein E	IQCE	2337.61	16861.6	4084.4	5325.2	8179.72	11701.2	6948.26	3783.69	5230.83	6262.67	12254.9	3985.12	18866.4	17605.3	8273.77	3509.95	5277.34	6888.01	5283.91	10241.9	6335.61	5124.43	10700.5	11128.5	8428.21	4812.32	4343.13	4446.97	5761.71	2720.06	3884.07	4522.61	8958.02	9345.65	5015.75	7033.97	6977.04	13152.3	9040.62	5342.51	3044.37	10915.2	7953.16	4198.07
H0YJW9	15	4	87.7246	Uncharacterized protein (Fragment)		32524.6	6323.15	11769.7	5508.47	3563.64	4390.99	14648.7	16965.7	7260.41	5498.7	7470.9	12162	2285.06	2204.7	3522.36	25440	4907.7	2933.93	18594.3	3566.05	12275.4	13274.3	1848.48	3035.25	2865.04	5746.23	8319.33	6613.62	5848.15	19715.2	10861.8	6156.99	1581.69	3466.49	8655.77	3196.5	4605.6	3208.85	4880.76	14634.5	13332	2448.11	4659.4	11750.6
Q14520	24	18	158.465	Hyaluronan-binding protein 2	HABP2	126000	144447	69663.8	101643	110333	157528	97636.2	77267.9	82433.4	69741.1	71717	82674.3	84106.2	87938	89359.4	56152.5	55225.3	84928.5	63335.2	72231.9	48768.5	51461.8	109263	76773.5	72971.7	47876.4	49661.9	58069.4	72500.6	49248.1	59916.4	64175.8	109269	91286.5	78876.9	79094.9	72141.6	110470	105502	71650.6	59927	76182.7	69173.9	74223.1
P27169	34	26	282.768	Serum paraoxonase/arylesterase 1	PON1	154483	441625	173923	612411	493481	824200	529358	182307	446260	239699	208451	228454	625217	430256	494993	62544.9	242108	367057	90009.6	297954	130122	97915.8	632368	203539	350620	90184.6	124214	201819	321397	49779.5	194380	331985	712408	353502	291751	443596	390328	480493	492932	184251	141648	402331	400464	154354
P06396	81	64	614.953	Gelsolin	GSN	662842	1.05187e+06	606620	1.07173e+06	956203	1.0114e+06	787617	582322	661247	533865	465393	516311	834619	739594	992383	267445	735511	628738	353105	667485	385192	362848	859078	490031	589526	464005	496813	509473	635034	285623	855897	828472	950885	728402	763856	944038	762076	768550	719523	535967	438699	750094	804432	602413
P04070	6	4	29.1684	Vitamin K-dependent protein C	PROC	13704.6	14778	7980.57	14254	14553.6	20431.1	12135.1	8008.34	10726.5	8465.57	8191.49	8693.72	11893.2	13152.4	9799.48	3297.98	8110.92	10350.2	9507.34	10736.6	6565.94	5998.84	11404.5	9640.6	10734.1	8213.91	7064.1	10192	11908.1	4773.22	6476.62	9154.05	14272.5	11806.1	11999.7	8601.54	10727.3	14766.1	9200.77	9157.49	8041.31	10620.8	8174.32	8237.37
P05546	62	51	493.709	Heparin cofactor 2	SERPIND1	292323	1.16629e+06	308104	719640	668879	1.19874e+06	662798	300050	452597	481630	588167	262577	1.12745e+06	908678	560571	129716	259914	660000	194018	568135	310441	218034	837652	503765	414244	375728	244338	290962	440526	119365	340620	404612	649849	634687	410957	664739	458807	838039	558705	390830	196873	638174	511095	339118
Q8IY22;P01210;P53677	5	2	24.6943	C-Maf-inducing protein	CMIP	14017.2	76611.5	18452.9	54155.8	56931.4	66887.3	27396.7	14540.6	25986.9	31659.4	21544.3	20539.5	75873.3	47580.2	53096.5	10852.5	19139.7	33211.2	12257.4	31695	18404.6	21451.8	78376.9	27290.7	56753.4	25126	13962	19116.2	15917.9	10768.7	21275	26745	75186.5	43680.3	30965.2	56712.4	24135.3	58968.9	57183.7	19769.9	15801.3	60640.8	42859.6	14397.7
P54756	4	2	19.4114	Ephrin type-A receptor 5	EPHA5	4842.34	6022.2	3982.39	1676.09	2130.73	1727.89	3182.91	6501.75	2343.66	4200.53	14664.3	4030.07	2578.63	2661.97	4525.67	27319.8	6387.41	11847.3	34523.5	4818.24	10399.1	16070.9	7815.6	6268.21	9066.24	2817.18	9882.83	4809.79	7364.28	24836.2	4080.88	1817.58	5446.79	2181.83	2154.22	3329.1	4416.1	8890.84	6796.3	3635.94	2340.91	1655.76	4642.7	5802.48
Q2M1P5	13	4	67.5329	Kinesin-like protein KIF7	KIF7	12006.9	18285.3	11478.4	14380.8	12480.4	29472.5	13480.1	7872.75	10166.8	13058.4	9500.03	8993.74	18604.4	16925.4	19654.2	8594.68	9983.76	15505.9	8764.35	13828.7	7480.19	8028	16786.1	12295.1	14684	11560.1	9078.63	8953.01	10607.4	8773.07	10833	11877.3	18584.7	14946.3	13139.2	16581.9	11275.8	15880.4	14239.9	8907.11	8142.32	13836.3	12285.2	8612.61
P15169	18	12	108.516	Carboxypeptidase N catalytic chain	CPN1	31999.8	76771.8	40562.7	69990.1	96220.3	95466.5	43663.1	38197.6	61243.3	41588.2	48777.3	36242.5	66849.3	77420.5	59928.8	12789.9	36784.3	41832.7	17700.4	41055.3	26432.4	24914.5	77785.3	40165.1	47261.3	42998.1	27832.1	42769.5	39546.6	12033.2	35805.3	37366.8	67527.9	38438.8	37664.7	55657.6	62383.5	68291.6	45476.9	41739.5	34243.6	69550.3	56182	33767.1
P08603	117	97	914.442	Complement factor H	CFH	713745	1.81168e+06	608898	1.19311e+06	1.14713e+06	1.37916e+06	890058	810035	1.07484e+06	702966	633725	854335	1.66848e+06	968740	704188	386066	587559	989885	630627	779753	596110	513825	1.35807e+06	685004	954448	671587	352896	444112	936204	590967	797256	585221	1.02758e+06	1.21036e+06	978836	631139	1.00437e+06	1.18002e+06	817031	925829	349551	1.06755e+06	879711	550827
P04196	64	58	333.407	Histidine-rich glycoprotein	HRG	307496	1.0789e+06	843191	1.16946e+06	1.30074e+06	2.22895e+06	863615	399482	831303	613514	699678	742607	1.35521e+06	1.00874e+06	1.10871e+06	427725	574996	1.04819e+06	525374	778910	452396	439703	1.27521e+06	538611	1.06598e+06	536607	523670	663083	999049	394415	762316	1.10989e+06	1.12458e+06	997882	814222	1.08393e+06	712738	1.2858e+06	1.32419e+06	586093	457179	1.29423e+06	927493	735398
P08697	45	39	388.925	Alpha-2-antiplasmin	SERPINF2	350791	699347	336918	766329	691966	1.22267e+06	517897	344677	475704	413825	472999	347130	900603	674739	614943	138779	312819	470074	157009	456426	313429	232302	729027	340123	548957	337201	237867	293257	416689	110556	333671	376302	619191	519298	452597	515754	394889	639023	543836	368105	222206	483979	476710	298403
P01024;P05198;P0C7N8;P53794;Q2KHR3;Q3SXM5;Q5T200;Q8N3E9;Q8NBP0;Q8TE49;Q9BW04;Q9H974	606	527	3526.85	Complement C3	C3	9.07217e+06	2.46182e+07	8.3008e+06	1.79829e+07	1.50498e+07	2.5344e+07	1.18401e+07	1.16365e+07	1.06234e+07	1.0139e+07	7.42869e+06	9.36641e+06	2.45928e+07	1.91297e+07	1.45446e+07	5.30864e+06	7.19898e+06	1.54847e+07	6.58786e+06	1.06945e+07	9.3285e+06	7.12591e+06	1.85383e+07	9.45713e+06	1.61089e+07	8.83195e+06	6.68691e+06	7.45635e+06	1.0596e+07	5.24672e+06	7.91404e+06	9.29873e+06	1.48276e+07	1.46747e+07	1.0677e+07	1.19904e+07	1.0479e+07	1.76516e+07	1.58621e+07	7.99494e+06	4.91616e+06	1.35102e+07	1.33294e+07	7.84981e+06
Q8N4C6	12	4	54.4168	Ninein	NIN	62058.3	20118.6	29620.3	20852.2	17689.1	13692.4	27107.8	29203.1	21697	23579.6	11226	44390.4	11624.5	17716.4	15990.4	71349.9	16580.9	12716.2	50130.5	19460.2	24758.2	37087	13470.8	9330.58	15076	11067.1	24860.6	20199.7	19892.4	60270.2	25713.9	16245.8	11166.9	12269.3	16382.3	13104.8	16565.5	12032.6	10984.2	17117.5	36418.9	10776.3	11566.3	27679
A6NMZ7;P51570;Q13158;Q6NT55	5	2	24.3272	Collagen alpha-6(VI) chain	COL6A6	17835.4	21000.4	20949.9	16993.1	13582.6	14826.3	18515.3	15174.3	18726.2	14762.1	23515.7	18382.8	12668.4	15102.3	12714	12726.4	14052	15347.6	15836.8	15898.7	20032.7	16285.7	9544.91	19401.9	12036.7	11005.1	19721.1	16529.2	11978.2	17663.6	11439.5	10435	9542.69	15115.4	16672.2	12564.1	19350.6	12363.6	11516	19262.3	12031.3	8418.07	7327.46	18974.2
K7ER74;P02655	21	12	167.01	APOC4-APOC2 readthrough (NMD candidate)	APOC4-APOC2	81247.1	111625	49677	135572	97521.2	119454	101495	73428.7	51403.4	86968.9	85417.1	87279.1	125907	108796	114309	36349.4	109620	68604.5	60356.4	41757.3	50855.1	31566.1	171785	72403.6	119010	86502.8	36848.5	47671.7	89861.1	27977.8	61571.9	71532.2	167501	132436	85607.8	160687	76442.8	108345	165270	136500	55777.4	102299	93698.9	72512.4
P05090	20	18	154.276	Apolipoprotein D	APOD	218801	214010	103034	176636	250585	239407	193732	125733	129624	139511	110691	141806	183558	207157	171994	76093.1	113761	112713	102344	141191	110174	124999	298145	162183	137422	159210	122282	149084	97481.3	89920	176620	208170	299380	120222	185257	202137	154227	155553	257598	169628	161635	231136	228852	121005
P01034	6	5	39.1867	Cystatin-C	CST3	11989.8	12370.7	25131.8	17006.9	18063.1	15249.9	25773.4	16372.9	36227.9	10755.5	14439.4	14133.1	13929.9	11971.9	12015.6	5412.23	9793.65	7939.06	8055.71	9101.04	15445.7	13150.3	11912.3	9802.84	9836.95	23008.3	19443.8	19442.6	12316.2	4197.51	13774.3	19122.7	11852	10324.6	21745.5	8630.33	11840	11840.2	11578.1	17273.9	31606	8621.71	11455	16664.3
O75038	5	3	20.9432	1-ph phatidylin itol 4_5-bisph phate ph phodiesterase eta-2	PLCH2	8716.77	4028.25	5667.79	5121.28	3898.37	3684.87	7240.93	4955.65	4837.98	5760.27	7423.91	6514.29	3916.28	2965.31	3646.79	7934.61	4471.72	2949.76	8302.93	6555.96	5775.47	6195.76	3136.24	8232.12	3176.11	5019.75	5387.55	5276.25	4518.39	6522.71	5300.33	4100.33	3513.7	3625.58	5740.74	3269.2	5270.06	3523.6	3159.14	9938.56	4143.21	3417.3	4561.56	5173.32
P20851	15	13	104.571	C4b-binding protein beta chain	C4BPB	41508.9	97669.7	44369.3	73378.2	77082.7	109160	75149.8	65274.8	57089.9	70450.2	64685.5	53897.3	139934	86302	74377	33153.5	40567.8	67157.2	30491.8	62188.8	33383.9	35622.1	81031.9	55875.5	55453.9	38392.5	39680	38534.7	58708.6	33355.1	33293.9	35402	67968.7	78072.2	58454.6	61450.8	65673.5	80908	50846.7	63814.7	23864.1	82934.4	82547.8	40418.8
P48736	14	7	69.3774	Ph phatidylin itol 4_5-bisph phate 3-kinase catalytic subunit gamma isoform	PIK3CG	594237	204248	253689	183686	111840	111288	209807	284340	190746	187473	295884	259577	42661.8	124253	119414	483057	178338	134376	367445	154175	335480	326555	57643.1	164236	165675	200878	328370	267107	219345	423487	269838	164270	56188.3	151190	223386	136593	123434	93503.3	128581	287429	303294	65425.4	128671	306908
Q96IY4	15	9	120.292	Carboxypeptidase B2	CPB2	52083.3	61434.2	35065.7	45554.3	47848.6	77295.3	45444.4	36698.7	41618.1	35483	46215.7	25595.8	45000.4	49815.9	44868	30453.4	32155.9	32918	31011.2	53828	26576.6	27043.5	44941.6	34966.4	35176.8	25928.6	27255.1	23682.1	29367.3	27480.4	30884.7	32157.6	44911.2	36434.6	35932.3	38452.8	39161.4	38530.3	37912.8	43119.4	29850.5	36397.2	31703.2	35548.5
P08294	3	2	19.5781	Extracellular superoxide dismutase [Cu-Zn]	SOD3	11670.9	71455.8	15098.1	11746.9	22859.3	16604.4	25583.4	24311.9	17755.4	23114.9	53408.7	11877.1	27972.4	22733.3	20815.7	25782.1	8946.26	9262.15	32450.4	13573.2	26342.5	19666.5	17731.3	23900.9	9957.49	13476.2	17514.1	11984.7	9298.58	30520.1	12183.8	10838.9	21286.2	14506.4	14723.3	13377.3	18796	20269.7	19668.5	19692.4	12594.7	20460.2	20096.3	13564.8
Q96L93	10	2	58.8876	Kinesin-like protein KIF16B	KIF16B	33671.4	34224.1	19250.4	31651.5	28645.4	24654.7	27562.5	28748.2	24419.3	22738	21542.3	36479.5	25164.5	20046.9	31415.2	23122.3	12006.8	15894.1	21644.6	21479.2	23694.6	28247.1	36506.1	17303.2	23358.1	25767	14936.9	14102.8	12295.3	21914.8	27018.3	21063.9	31073.9	24052.5	30196.3	27162.8	15376.6	30469	29610.3	38139.4	24971.7	34098.8	28803.3	15257.9
P02649	49	43	444.021	Apolipoprotein E	APOE	470029	582516	422435	689347	607893	654139	565393	473907	464588	442074	306412	490343	394471	538334	619957	274658	590317	349759	411299	378901	357997	332283	659411	409027	504880	425238	298721	309004	422713	343930	406683	376693	806560	496356	464357	536806	477206	445928	489903	632343	388279	487867	448966	391801
Q9Y4C1	4	3	21.016	Lysine-specific demethylase 3A	KDM3A	28849.6	34300.6	20830.9	15780.6	19614.7	29876	20278.2	25320.8	17232	18706.1	36020.7	20201.2	15047.8	22378.3	21522.3	21443.1	13523.7	18148.3	31144.6	8624.86	18489.9	19154.3	19493.5	19240.7	14324.7	13753.4	15489.3	12855.7	15384.8	21051.7	17388.5	14286.4	16136	11538.7	19088.3	11718	19463.2	18688.7	15377.5	20801.3	14170.1	11899.1	17682.3	19825.2
P02746	22	20	141.695	Complement C1q subcomponent subunit B	C1QB	157833	329797	149904	261828	221958	255864	203085	173076	184100	144972	201307	179086	250539	257965	242386	105410	145548	206980	99769.2	242924	165330	121619	253452	189019	234127	157635	137044	138020	159778	92560.7	142983	182208	181376	210805	191991	180472	172635	231416	174310	186983	87131.7	201586	188972	128988
Q92954	7	6	44.2769	Proteoglycan 4	PRG4	8704.34	55281.6	10545	26657.9	25231.8	33580.6	19357.6	18746.8	16496	17112.7	33297.5	19320.6	31038	20002.1	20304.4	12233.7	10958.7	17725.6	16365.2	16378.1	10930.5	11179.9	33938.8	14477.8	16570.4	13207	11052.8	10669.2	18568	8802.22	12599.8	9900.8	25498.9	28738.7	15755	11923.2	18346.2	21742	16503.7	16623	7324.75	19878.5	18707.1	12096.4
Q9UK55	22	13	125.821	Protein Z-dependent protease inhibitor	SERPINA10	41298	261396	64042.8	140259	177463	228896	106290	65871.3	64433	106838	188368	47749.6	106967	148575	128033	77816.9	77635.6	86070	106305	73430	81753.4	68598	196035	142240	148537	60687.6	75940.5	68572.3	61832.4	89830.8	56788.2	59666.7	126091	113599	73296.1	98462.6	116229	125574	137307	79828.9	33964.3	104434	92616.3	58836.1
O75636	8	4	61.1575	Ficolin-3	FCN3	8729.73	26737.5	6105.22	16430.4	19683	33754.4	15080.8	16321.9	15476.9	28872.8	21351.5	9973.67	19490.6	21358.1	19744.1	6894.69	13502.1	20320.6	7865.39	12565.2	8760.85	5956.97	32872.1	12947.1	12743	14925.6	7995.23	7288.48	14226.2	5952.5	10740.6	17499.6	29464.4	17092.2	17699.7	10990.2	18829.3	25496.4	24908.1	17975.8	4594.76	15543.1	14666.9	11087.5
P02753	36	32	268.274	Retinol-binding protein 4	RBP4	786170	715503	325341	1.00126e+06	572555	575956	769590	340566	467320	400218	390105	496266	438614	359073	441772	330089	338088	322543	340480	256723	331311	229504	534222	379184	321688	324940	361927	240390	353444	181030	367230	437055	664650	317312	458114	470012	410182	492114	467463	441612	416270	382510	304386	432969
P02743	3	3	15.1809	Serum amyloid P-component	APCS	28209.2	24543.3	18006.5	22868.5	18230.4	30854.5	22445	22663.7	19942.1	10383.3	15016.6	14862.1	44010.7	20225.5	24066.4	12085.1	18708.2	19778.9	12853.4	17337.2	15645.4	13361.1	26237.2	12632.5	23994.4	15252.7	14268.2	9624.79	14355.4	11222.6	19810.9	17077	24530.8	22463.4	24148.1	21358	16760.1	15980.3	15297.1	20253.5	14007.5	19142.6	22603.6	16525.4
P13688	2	2	4.7499	Carcinoembryonic antigen-related cell adhesion molecule 1	CEACAM1	211445	439741	477788	762359	870990	559666	915493	223666	727412	262063	370265	374660	135437	335466	647168	89151.9	308992	249128	109349	340467	384093	315754	733912	631341	242257	487377	479784	654085	502563	72980.4	482159	747892	817302	410036	683105	464933	402966	660181	596472	422412	559434	284800	602399	338658
P04003	47	42	443.834	C4b-binding protein alpha chain	C4BPA	548995	1.04406e+06	550912	803975	867254	1.02778e+06	815156	651192	615520	726494	576045	581695	1.28219e+06	951041	770086	307287	360315	690740	352075	585314	324703	415896	832206	582737	534366	422013	429912	459891	537649	380753	365235	400346	721045	754350	602857	651595	539925	849822	577891	642145	400150	777673	718964	391268
P00742	29	19	176.11	Coagulation factor X	F10	143852	215415	104637	173357	173990	222926	148298	104942	139859	130564	123648	115319	203366	164604	176897	112552	108714	103692	90941.5	146853	85778	104699	232216	124263	135010	108198	89800.5	82263.1	97459	84028.2	102573	109011	215320	150409	125602	165243	132683	164098	147007	133875	95080.4	169751	140106	99172.8
P80108	21	13	121.763	Ph phatidylin itol-glycan-specific ph pholipase D	GPLD1	63280.5	78348.9	67006.3	44570.4	48461.1	74376.1	62467.2	55191	58460	40617.5	49641.8	37592.9	63551.8	47424.1	43150.2	18551	93097.8	41739.6	29936.3	54309.8	59642	41722.4	74314.1	47940.4	40186.3	73599.4	42521.5	53233.1	33047.2	21150.6	38042.6	34725	61527.2	31596.5	51654.2	34021.5	48673.4	38209.6	56795.4	51112.5	101241	47800.7	44664.4	35525.4
P02654;Q9H223	22	20	118.435	Apolipoprotein C-I	APOC1	190519	181075	119816	220005	224116	209903	154503	174633	160248	140214	85738.8	150854	137836	166011	173574	81022.6	142352	89190.6	108544	73591.2	88010.6	88231.4	222030	117879	114591	200999	73731.2	76073.2	83331.3	59162	125797	111579	256941	144995	116933	192375	122703	143483	192927	135792	156948	160628	165950	153515
P00747;Q02325;Q15195;P57058;Q9HC62	136	117	926.084	Plasminogen	PLG	1.3044e+06	2.53488e+06	1.06575e+06	1.55592e+06	1.56748e+06	2.37808e+06	1.66155e+06	1.26183e+06	1.41193e+06	1.16567e+06	932436	1.29938e+06	1.73479e+06	1.32628e+06	1.35638e+06	712190	1.03667e+06	1.27169e+06	718217	901858	813153	750159	1.66559e+06	982313	1.13577e+06	961381	801080	894674	1.18674e+06	636671	1.10004e+06	954199	1.73647e+06	1.42327e+06	1.2419e+06	1.42679e+06	1.30011e+06	1.79377e+06	1.51969e+06	1.14009e+06	832038	1.44721e+06	1.16281e+06	1.20164e+06
O75882	16	12	98.8761	Attractin	ATRN	110706	104251	62136.7	98332.6	72572.2	83812.3	78237	56205.6	64481.2	57998.1	46755.1	79390.5	67547.3	67632.3	73614.9	54934.2	51983.3	54965.4	74413.5	58121.9	55380.1	59282	72221.2	62250.9	64318.3	42397.7	56728.3	58110.5	69664.3	71811.1	56029.8	60263.4	83075.5	71206.8	66671.6	51280.6	66274.8	79708.8	77018	62855.9	49093	58504.9	53961.3	56721.7
P46459	5	5	27.1335	Vesicle-fusing ATPase	NSF	104920	171384	138976	177377	147404	201806	227407	99842.8	159136	120686	106604	121554	206880	171912	168840	26239	141428	169145	32619.3	138512	81641.9	80174.1	274921	150211	159986	89350.4	88244.5	71159.7	126022	20047.8	96047.7	140360	147855	112174	129759	160850	132919	165729	194591	133684	91339.7	166273	149598	161205
Q04756	11	9	62.8882	Hepatocyte growth factor activator	HGFAC	17990.1	43268.2	13204.9	34298.1	25470.1	37054.4	21776.3	16151.2	24897.6	20115.5	31525.8	24716.2	23294	27709.4	25737.2	26800.9	15885.2	20245.4	30228.1	29248.5	23180.3	20150.8	35370.8	24350.2	27529.8	14304.1	17798.7	18258.7	18811.5	33862.2	15340.1	24311.7	28817.2	30864	19507.9	15382	29615.5	34389.8	26126.5	17353.4	13501.6	23211.1	17840.6	18020.3
O43866	7	5	38.0835	CD5 antigen-like	CD5L	6969.46	12757.3	6005.41	12372.8	7517.24	16528.1	17860.3	18750.2	8291.04	7302.02	11728.4	10849.3	11436.5	8530.78	10721.6	7299.7	7595.05	8460.01	6380.85	6415.95	6491.8	5494.72	11942.9	10646.9	10856.4	11232.7	7882.06	5308.48	7588.35	7030.15	17179.1	8683.88	12206.1	11034.6	8359.47	12029.2	7109.32	9409.16	10941.9	8714.46	6252.83	10262.2	16592.6	8610.51
Q6ZN16	5	2	17.7189	Mitogen-activated protein kinase kinase kinase 15	MAP3K15	48725.6	31716.9	24190.4	36956.8	21514.1	28810.8	44893	36294.3	30444.9	17421.5	13169.1	28967.3	15562.2	20344.1	21852.7	35397.1	19065.4	16419.6	43882.9	14410.6	19987.5	22566.8	18516.1	13901.2	16604.1	17885.1	16468.5	14558.4	17813.1	33157.9	19832.9	20445.7	18989.5	19519.1	19588.5	21819.3	18874.1	24552.9	21915.1	25246.1	19532.3	15560.2	18875.6	22397.9
P01031	107	83	799.802	Complement C5	C5	495080	1.23189e+06	482797	1.02017e+06	968757	1.55688e+06	882305	504735	690116	626359	566851	546753	1.10134e+06	1.05405e+06	939431	284807	498790	753103	351521	720417	437610	392428	1.05229e+06	846606	903256	487901	459661	513619	690803	299478	551037	678507	968582	823228	663100	849368	722420	1.15535e+06	907394	594590	357116	820483	754821	458424
P10909	62	51	454.119	Clusterin	CLU	704444	1.04059e+06	580480	783631	892032	951067	854291	591054	766688	566331	561025	656918	749068	798697	620154	338327	515193	540825	421046	597523	493504	410356	759740	391734	583019	461074	350500	394650	608334	197844	554711	647298	777966	546101	609237	560908	573119	657852	649053	606236	469435	630029	474832	516396
P01344	7	4	27.5203	Insulin-like growth factor II	IGF2	39210.1	34171.8	23813.3	25039.9	19348.1	22990.3	31217.8	29414.4	21623.6	19241.2	18585.3	26807.4	14279.8	16403.5	22237	18750	21206.7	17774.9	24241.4	18625	16538.2	20379.5	20953.2	16323.1	15668.9	14376.5	17032.7	18395.6	18140.1	24535.1	22684.7	20648.5	20472.2	18238.4	24086.8	17613.1	21707.9	18843.8	19420.2	24001.8	22100	15294.3	16304.9	24239
P02766	22	19	214.444	Transthyretin	TTR	394927	707028	410263	532720	476363	545929	534042	339644	384938	403478	483783	389024	430867	541138	461806	438728	272458	521613	287242	320808	416080	308292	450271	374631	382004	286760	369133	332261	314793	309270	333417	422699	467367	308783	355049	406723	378589	352922	324996	289563	214636	231479	163717	274584
Q1X8D7;P09661	9	5	37.6257	Leucine-rich repeat-containing protein 36	LRRC36	98247.4	163159	95532.6	149499	147720	186021	300139	97883.7	151097	110264	121226	132579	146147	146087	145432	34082.6	119152	113142	74435.6	116599	264133	115118	136392	159587	131727	173810	154310	242437	137201	39712.1	137890	173012	144614	110769	231230	144237	138789	149213	116304	301243	125534	133626	103477	155946
P10643	39	35	304.521	Complement component C7	C7	234991	448487	195468	245745	211932	268617	203854	218396	199953	214984	237835	214898	211805	210167	185494	230910	186569	204786	199527	124039	119000	200431	227546	169020	233637	203854	229111	214140	242312	208629	181436	242446	171436	168802	171008	252797	170009	245659	194813	178422	218098	269338	181330	187888
P05543	17	11	109.512	Thyroxine-binding globulin	SERPINA7	23705.6	49972.7	22916.2	52295.7	58139.9	73836.1	41259.2	25719.9	49486	34442.3	43582.9	37862.8	46594.9	56781.3	45578.7	21384.4	15284.1	42601.5	21078.3	29924.6	20488.6	20986.5	65201.2	32893.8	37696.2	23866.5	24773.2	26558.5	29584.1	7529.54	30956	37424.1	84937	50580.5	47092.4	48642.8	16919.9	58659.7	40288.4	33521.9	26011.1	52901.6	41216.5	26013
P12544	2	2	8.8205	Granzyme A	GZMA	6236.66	12665.1	5850.41	11799.2	9646.36	18752.9	8918.99	6746.27	7475.97	8225.95	7018.52	7331.83	17496	12810.5	10765.1	3241.63	7331.5	9797.72	3452.42	9207.14	4163.59	4083.19	13460.6	8368.41	11073.3	6034.04	4338.81	4284.67	7846.39	3233.42	4583.12	6219.34	10329.8	9596.42	6233.04	9786.9	8339.31	9649.43	10358	6130.91	3397.98	11192.6	9156.11	5550.58
Q14244;Q6UVJ0	14	6	95.5799	Ensconsin	MAP7	35811.6	28850.1	16379	20562.7	21692.3	35546.7	25388	23240	20152.4	9490.27	10907.3	24359.1	31360.6	31277	22257.8	16191.1	15393.4	18893.1	23167.7	20560.8	13713.5	15299.4	20809.2	13773.4	21635.7	20109.8	13288.5	15328.8	17318.8	13529.4	18366.6	16937.2	24779.3	21041.5	21592.1	23454.2	20472.2	24098.4	21900.5	23474.3	17943.8	22703.1	23142	17341.6
P49908	9	6	42.0605	Selenoprotein P	SELENOP	40146.3	58857	38835.9	50843.3	52069.3	68692.4	53473.3	44500.2	56261.2	42767.3	47836.7	50215.5	71946.1	49239.4	59833	33017.6	65780.1	40069.7	21218.3	51585.1	21567.6	27457.7	60251.1	34346.4	40628.3	21988.2	25035.1	26878.9	38967.2	15133.7	30713.2	36340.2	64741.6	37287.3	38564.8	54849.1	47953.9	48284.5	61307.5	37379.6	22068.9	47312.1	47014.8	24881.4
P19823	138	125	938.54	Inter-alpha-trypsin inhibitor heavy chain H2	ITIH2	2.60194e+06	3.32312e+06	2.02346e+06	3.77596e+06	2.73399e+06	4.05213e+06	3.77333e+06	2.25857e+06	2.55763e+06	2.18108e+06	1.77023e+06	2.61412e+06	3.04824e+06	3.01305e+06	2.55295e+06	924951	1.79327e+06	2.15614e+06	1.48609e+06	2.13108e+06	1.99665e+06	1.5276e+06	2.90708e+06	1.93398e+06	2.48188e+06	2.06156e+06	1.36429e+06	1.55764e+06	2.34185e+06	781234	2.16304e+06	2.13454e+06	2.96164e+06	2.17963e+06	2.50237e+06	2.43399e+06	2.9026e+06	2.94189e+06	2.08213e+06	1.93136e+06	1.7464e+06	2.54157e+06	2.22375e+06	2.22034e+06
Q96KN2	19	15	127.96	Beta-Ala-His dipeptidase	CNDP1	134706	154303	124596	129537	162108	140749	169851	153079	152137	81537.3	80350.2	108101	80875.6	111073	141578	78736.3	72136.7	81885.7	89150.3	71373.1	90798.5	91919.7	144158	84923	83223	80817.8	83534.2	81439.2	83140.3	69183.9	94968.1	98761.7	144606	95717.6	108369	109730	97844	116904	123713	93787.6	138615	83725.1	93423.3	99338
P01011	73	64	545.178	Alpha-1-antichymotrypsin	SERPINA3	383430	1.66301e+06	587199	1.21022e+06	1.50058e+06	1.77413e+06	1.10066e+06	575333	969892	1.10744e+06	1.4601e+06	890406	1.39303e+06	1.82276e+06	1.20353e+06	267579	220231	762565	309257	1.0926e+06	930397	886482	1.09032e+06	1.2116e+06	1.27075e+06	761091	639886	1.4374e+06	689325	240232	518554	765249	1.03052e+06	1.15741e+06	956387	928865	423343	1.21935e+06	821698	1.08507e+06	421593	1.13449e+06	1.07963e+06	372800
P43652	88	77	663.951	Afamin	AFM	1.21634e+06	1.36855e+06	724761	1.59312e+06	934198	1.54855e+06	1.05616e+06	738230	1.07788e+06	794375	1.07301e+06	773469	887254	1.0629e+06	922384	353389	774355	887962	536320	689106	490997	584355	1.32958e+06	517440	1.06172e+06	791753	529569	578729	1.11726e+06	330988	694184	984932	1.28613e+06	975390	851252	953848	1.12188e+06	1.25723e+06	1.0174e+06	919717	672934	740110	816835	671554
O95522	3	2	14.6619	PRAME family member 12	PRAMEF12	2728.04	2928.29	3118.09	5041.94	5675.97	7045.64	4087.57	3340.58	4918.97	3179.08	1329	4132.86	5911.41	5929.03	4412.13	3042.21	4308.29	3738.43	1113.33	3921.27	2165.16	1997	5125.04	2119.1	4112.71	2441.76	2597.7	3042.56	3369.83	2886.89	2479.65	5209.94	5794.69	3925.77	3478.44	4613.84	3402.46	4295.21	4392.46	2748.63	3319.06	4252.66	3581.44	2984.71
Q13976	16	6	70.7606	cGMP-dependent protein kinase 1	PRKG1	37489.5	90499	29996.6	102306	118684	134647	51083.3	35126.5	57016.5	57159.3	37733	46032.1	98038	88755.1	102210	41269.5	43512.2	57031.8	30860.7	64559.3	43086.5	39508.3	145214	44362.4	94795	46931.3	32728.8	37341.7	33951.7	26462.8	44010	48832.3	170996	90596.9	66906.1	93820.5	42227.5	108989	97280.4	46533.4	27737.4	130556	82584	34204.2
P00740	13	10	71.8271	Coagulation factor IX	F9	56792.4	63080.2	41585.4	65149.5	75609.7	80279.9	46154.9	42899.6	51609.1	46092.8	44452.2	59859.1	44628.8	40378.8	76858.2	43920.6	37647	41304.4	36654	27847.9	26201.8	36594.1	41257.3	30438.2	36445.1	33459.5	30114.8	23592	36439.4	45773	26486.4	33307.9	30852	33071.4	35689	34712.1	34273.1	38008.4	38848.4	35809.8	30856.3	30755.4	35570	37265.9
Q8IV77	3	2	14.3995	Cyclic nucleotide-gated cation channel alpha-4	CNGA4	102312	108189	54517.2	76665	57706.5	70430.7	76462.1	62208.5	56472.8	78906	126280	54942.5	52024.3	46974.9	47049.5	73519.3	34969.9	54774.7	75708.7	102015	68780.4	62676.4	40013.3	121170	36506.5	43298.1	54971.3	60396.4	62445.9	53065	45290.3	32417	24990.9	65163.4	52504.2	34189.7	60975.2	52412.9	37012.5	77986.2	35840.4	46084.9	45861.7	56216
P01019	38	33	309.336	Angiotensinogen	AGT	456899	1.04611e+06	451632	931986	1.04315e+06	1.48708e+06	615086	351173	710077	655436	689932	602051	900943	783219	898767	181391	263111	513751	240360	588031	401291	332992	712322	611129	549784	317685	374453	476320	477333	144592	518341	348550	1.1856e+06	649752	519223	754071	447419	914268	692670	422540	393841	586798	505823	416564
O00750;Q8NI17	17	7	84.9242	Ph phatidylin itol 4-ph phate 3-kinase C2 domain-containing subunit beta	PIK3C2B	20942.5	66457.8	22945.8	29855.3	33685.7	33537.8	30957.1	27937.1	24419	35792	70125.1	22386.7	41635.5	36188.7	29603.3	25043.4	15848.2	23745.2	25942.8	57213.2	31077	23837.4	28327.9	48422.1	21915.2	22150	25691	26625.9	24461.4	21646.9	20496.1	20906.5	23649.7	31529.2	26802.8	23095.9	35691.4	32524.5	24963.4	32178.9	15518.4	31950.7	31088.4	23582.1
P03952	52	40	371.43	Plasma kallikrein	KLKB1	234860	342566	182567	284917	256379	406781	325343	237901	236450	184156	172042	190568	357143	278149	215881	120075	155969	252453	136754	206672	132895	143484	323396	164968	202373	150577	133452	141078	199318	140296	212628	168473	303820	242099	195025	229732	223999	326793	291668	191416	178417	244346	238534	184534
P11226	5	3	30.279	Mann e-binding protein C	MBL2	26601	9452.81	7645.02	17664.1	13586	13687.9	9224.65	5665.36	6628.58	8607.93	10926.3	9048.81	7252.85	8117.96	10625.1	6779.27	4427.03	4752.34	8109.5	7370.16	14615.9	12808	21473.4	8374.35	7387.47	21794.1	8544.39	6653.49	9956.35	17865.1	16594.5	8053.67	7391.37	6411.77	6019.45	6505.28	12823.1	9667.24	13201.4	15282.9	8206.12	8953.43	10563.9	7047.64
P00748	12	9	74.246	Coagulation factor XII	F12	152051	80408.2	72756.3	85486.3	76185	91915.7	81785.8	93356.2	83213.8	57061.9	54041.2	96610.6	81415.4	55344.4	70782.4	94476.7	53218.9	46995.9	85121.7	60226.6	59005.9	73827.6	59408.6	67327	67649.9	57126.1	59515.7	51010	62998	65861.6	85865	58241.9	85851.4	64414.8	84955.7	47261.8	66941.5	78400.6	66726.8	93942.1	64176.5	66463	64315.9	68797.8
P05156;Q5SWL8	63	54	485.668	Complement factor I	CFI	525026	848246	370637	643982	541879	798739	489875	449814	455742	341989	476989	436239	591758	514915	578891	376100	372016	523327	361082	436664	343534	358962	661635	376412	603439	348449	305168	341252	445847	313184	372128	378194	531964	527170	450925	451922	481692	606148	537006	415202	272485	472246	483214	377911
Q96ET8;Q9NYZ1	4	3	14.7828	Golgi apparatus membrane protein TVP23 homolog C	TVP23C	12591.9	23243.3	15101.7	20613.2	22351.4	28790.3	21343.8	15695.6	20984.9	11856.6	12947.1	15158.6	18943.1	18441.3	17339.6	10238.5	14081.6	15344	9706.33	12056.8	11490.1	10628.9	24210.8	13945.3	18286.8	15073.5	12237.7	13573.5	16221.5	10441.7	20071.6	15962.5	25217.2	18614.3	18515.9	17653.4	14413.8	19974.1	21653.9	13043.8	14635.1	16140.3	24451.5	14846.2
P05452	21	17	176.313	Tetranectin	CLEC3B	189869	143978	79287.4	162432	198447	135073	112337	89473.1	97589.6	80327.3	63873.1	88601	117614	101821	144445	60369.3	95587	91442.1	68885.6	111132	74367.5	60279.4	133581	73376.1	101506	75076.2	67383.8	77150.1	94981.3	73220.7	135885	148962	163202	108962	130294	163484	94628.3	121123	107088	89194	86527.2	94908.5	107916	82957.6
P09429	5	2	29.4706	High mobility group protein B1	HMGB1	15091.4	25182.9	18817.5	15329.9	15804.2	24358.8	21499	22253.4	22250.7	10505.3	12914.8	14437.4	6017.98	8706.96	11264.9	5157.96	10670.5	7565.64	8522.81	8964.5	19574.4	12532.4	11492.4	9410.47	8037.32	12272.1	12273.7	20400.4	17352	4651.04	13546.7	10646.4	11981.6	8394.21	25910	5726.5	10506.1	10980.9	7856.15	20642.2	10244.9	6014.4	7290.79	14811.2
P07225	42	36	288.736	Vitamin K-dependent protein S	PROS1	236698	368153	194665	318632	272173	371817	303611	223561	233882	218945	194048	222812	339969	305713	271013	139347	197626	222958	163667	202861	138892	171870	307637	208702	203231	156609	160274	166525	194993	161694	134429	148382	280258	231472	221641	239182	245479	256568	236816	241835	144258	241167	244187	179938
P04278	8	7	57.4317	Sex hormone-binding globulin	SHBG	23598.9	17376.4	29996.9	36104.2	27504.9	61969.2	26807	11936.6	27782.1	49671.4	20937.8	36936.7	20802	35676.4	35152.5	17121.6	26405.5	16880	16545.2	28249.8	23299.8	17475.6	24562.1	50540	12873.6	29089.9	33005.6	44922.1	22103.1	11587.1	23794.7	48612	20094.2	31872.4	23362.3	31079.5	57275.2	44831.3	14835.5	25155	33313	41620.8	27926.5	20716.6
P38919	5	2	27.0021	Eukaryotic initiation factor 4A-III	EIF4A3	263936	280295	193725	252191	211133	287119	287272	238868	215148	181245	155349	252609	211145	199716	213003	308433	190214	161858	198225	156518	210938	243071	191122	166991	181370	125764	181088	138761	174189	187813	194912	175450	192889	186976	201589	168512	211926	181972	123803	220424	169337	175170	147743	190679
P01008	109	92	754.562	Antithrombin-III	SERPINC1	2.06261e+06	2.66543e+06	1.3819e+06	2.58329e+06	2.07863e+06	3.79311e+06	2.86841e+06	1.96408e+06	2.03922e+06	1.75124e+06	1.91652e+06	1.86393e+06	2.21033e+06	2.2538e+06	1.92083e+06	1.1773e+06	1.76313e+06	1.59497e+06	1.23016e+06	1.51947e+06	1.31845e+06	1.10901e+06	2.17356e+06	1.44119e+06	1.47207e+06	1.34058e+06	1.17972e+06	1.39142e+06	1.62206e+06	957964	1.50609e+06	1.73533e+06	2.28595e+06	1.59966e+06	1.80539e+06	1.85363e+06	1.78852e+06	2.25266e+06	1.58042e+06	1.50749e+06	1.31499e+06	1.85638e+06	1.56092e+06	1.45256e+06
P00734	120	95	741.777	Prothrombin	F2	1.55872e+06	2.48323e+06	949120	1.91364e+06	1.72796e+06	2.77802e+06	1.99887e+06	1.32247e+06	1.40055e+06	1.3658e+06	1.03588e+06	1.31889e+06	2.32126e+06	1.98777e+06	1.58839e+06	547661	1.26173e+06	1.38311e+06	953765	1.05487e+06	722757	971621	1.94347e+06	1.13223e+06	1.44731e+06	1.04195e+06	842322	991406	1.16017e+06	805801	863559	900875	2.05523e+06	1.63279e+06	1.29902e+06	1.42856e+06	1.51284e+06	2.03317e+06	1.31648e+06	1.06725e+06	930595	1.60521e+06	1.37949e+06	1.11354e+06
P06727	129	111	863.555	Apolipoprotein A-IV	APOA4	2.65313e+06	3.05093e+06	1.89126e+06	2.29735e+06	1.881e+06	2.56654e+06	2.12827e+06	1.67122e+06	2.11871e+06	1.75139e+06	1.42093e+06	721156	1.74144e+06	1.23908e+06	2.07475e+06	990729	1.53749e+06	1.96506e+06	1.49171e+06	1.81887e+06	1.36406e+06	1.42769e+06	2.20217e+06	1.51095e+06	1.20248e+06	1.19385e+06	1.67867e+06	876976	1.2442e+06	755378	1.94013e+06	1.32282e+06	1.46147e+06	1.42555e+06	2.02912e+06	2.49947e+06	1.54557e+06	1.48774e+06	1.58936e+06	1.34451e+06	1.71028e+06	1.94187e+06	1.86561e+06	1.79403e+06
Q16610	17	14	108.669	Extracellular matrix protein 1	ECM1	128267	50630	44989.5	46553	46910.3	46642	49293.1	46836.4	38540.1	41302	40718.2	75297.1	39886.1	55492.4	33672.6	136539	31484.4	33836.6	101498	58303.3	47301.7	70263.4	31745	34277.5	38679.4	36543.6	54293.9	39738.7	37759.2	160057	56016	37077.8	37802.4	31607.2	40207.9	45806.7	29207.9	44391.3	44812.6	35265.6	50112.1	33656.2	41991.8	49712.2
Q562R1	12	4	95.6061	Beta-actin-like protein 2	ACTBL2	21579	25407.9	14594.8	23600.3	18232.6	26069.6	25106.6	14655.3	19523.1	16010.4	16152.3	21266.2	13114.5	18609.9	18141	16126.4	10009.5	15436.5	23392.7	17073.2	19012.8	15905.7	16093.5	19682.2	14127.4	14523	13251.7	15759.8	16804.9	17273.6	14989.2	11604.9	16070.4	15722.2	19346	13476.8	19363.8	18545.3	16251.8	17034.1	12907.6	13295.7	14430.2	18655
Q9P2J5	4	2	21.2342	Leucine--tRNA ligase_ cytoplasmic	LARS	35478.5	54763.3	29820.4	43923.5	37125.4	52537.9	55457.1	30251.7	48711.5	31561.6	40074.4	45322.3	56245.6	59593.4	49301.9	22665.2	62682.7	41738	31458.7	45505.5	28833.5	33251	66846.4	51194.3	51518	27381	25679	29107.5	52007.2	14214.3	26536	43779.4	48112.7	34336.7	38128.2	36061.9	37613.5	39499.4	35474.3	34634.2	25805.6	38443.6	35258.1	36418.6
P00450;Q96CS3;Q96L14;Q99551;Q9BRC7	261	238	1591.48	Ceruloplasmin	CP	3.86438e+06	1.20583e+07	5.59202e+06	6.16627e+06	6.89748e+06	1.0779e+07	6.54106e+06	5.2001e+06	5.66223e+06	5.16715e+06	4.29556e+06	4.33383e+06	8.89439e+06	7.20909e+06	6.94412e+06	3.11721e+06	4.02316e+06	5.42023e+06	2.55427e+06	4.91846e+06	4.72355e+06	3.63614e+06	7.34543e+06	3.39678e+06	5.33444e+06	3.42061e+06	4.23493e+06	5.74208e+06	5.35688e+06	3.35721e+06	4.56794e+06	4.34951e+06	6.24794e+06	5.21049e+06	5.64375e+06	6.01248e+06	4.77156e+06	7.10446e+06	4.40196e+06	4.89906e+06	3.53913e+06	5.31307e+06	5.94138e+06	4.82123e+06
Q7Z7B0	9	3	56.1547	Filamin-A-interacting protein 1	FILIP1	16637.1	17094.6	11103.1	13974.3	16093.9	15582.5	21445.4	12685.2	12435.8	7223.24	8553.86	16583.8	7603.12	19621.1	15633.5	8460.63	7831.55	10212.7	13098.2	12968.4	9059.73	11194.1	20211.6	10611.4	15160.1	6157.74	11169.2	11049.4	11538.7	6859.48	11874.1	10352.6	17086.3	11366.1	12043.4	24613.3	13786.9	20250.5	20178.9	16696.4	13596.2	17597.2	14949.9	22353.2
Q8TE85	6	3	28.7347	Grainyhead-like protein 3 homolog	GRHL3	26477.6	22430.4	12403.7	14921.5	12967.6	14869.7	14858.6	10976.8	8924.53	11570.3	10037.5	8968.37	6875.09	10683.5	11999.5	11366.3	9082.05	8434.19	18895.1	7859.85	10951.1	12007.9	13950	12174.6	12393.5	9119.11	10207.3	9048.28	8648.48	15306.7	12281.4	9843.22	8440.9	12460.3	13729.7	8614.05	14204.2	11906.5	12221.6	13769.7	9728.18	6880.3	7674.93	14427.9
P04180	7	6	37.8402	Ph phatidylcholine-sterol acyltransferase	LCAT	43380.1	32505.8	28177.2	24684.2	20049.4	23030.3	26277	34210.3	32740.6	25269.7	29097.8	38259.9	12744.9	28853.4	21995.4	70870.1	20583.5	49033.5	69877.5	18481.9	37783	43498.8	16116.8	33882.5	36186.4	18036.2	30790.7	33377.7	24469.7	100575	29626.8	21972.6	14767.6	23445.3	31803.5	34557.7	29581.3	18518	31127	27673.3	23228.2	12614.1	20316.3	30145.3
P07996	6	4	30.2342	Thromb pondin-1	THBS1	10954.5	50769.7	11294.7	13267.9	10235.5	18629.8	17239.4	13292.5	12347.5	26189	53050.5	13373.7	40455.7	19791.5	12484.2	10214.2	16432.3	14539.2	16376.3	31287.6	16372.1	13263.7	21186.6	25070.4	14494.6	10479.2	12893.5	8009.91	18063.2	12110.1	14321.9	9361.22	9569.29	20017.5	11006	17559.1	16328.3	13690.4	11120	16622.7	7395.93	13285.9	21721.9	14199.1
P01042	89	82	598.081	Kininogen-1	KNG1	1.86712e+06	2.68586e+06	1.31192e+06	1.98245e+06	1.99494e+06	2.96569e+06	2.18968e+06	1.441e+06	1.6253e+06	1.34154e+06	1.45478e+06	1.35484e+06	1.70843e+06	1.57101e+06	1.74759e+06	1.07412e+06	1.25278e+06	1.43637e+06	1.13154e+06	1.43563e+06	1.15621e+06	1.06498e+06	1.79458e+06	1.24886e+06	1.43258e+06	1.17923e+06	1.09397e+06	1.16857e+06	1.56276e+06	1.07616e+06	1.35096e+06	1.39007e+06	1.82696e+06	1.58542e+06	1.56505e+06	1.59115e+06	1.39726e+06	2.00921e+06	1.82509e+06	1.5821e+06	1.11767e+06	1.47889e+06	1.39772e+06	1.36846e+06
P05155	112	97	661.629	Plasma protease C1 inhibitor	SERPING1	1.5235e+06	3.07319e+06	1.51875e+06	2.60008e+06	2.74668e+06	3.74594e+06	2.44183e+06	1.47652e+06	2.03274e+06	1.84421e+06	2.23433e+06	1.40248e+06	2.66081e+06	2.96032e+06	2.45853e+06	718545	1.54523e+06	1.74723e+06	836688	2.01006e+06	1.30787e+06	1.21197e+06	2.85467e+06	2.3857e+06	1.5629e+06	1.31599e+06	1.23106e+06	1.50676e+06	1.92124e+06	511792	1.27263e+06	1.84313e+06	2.96457e+06	1.78921e+06	2.01285e+06	2.06977e+06	1.84783e+06	2.60147e+06	2.20855e+06	1.80541e+06	1.10531e+06	2.22429e+06	1.35502e+06	1.21741e+06
P22352	17	10	139.844	Glutathione peroxidase 3	GPX3	41395.5	178891	50731.3	121146	174418	153921	87663.2	34811.3	78183.2	79643.6	62918.7	66806.3	175706	154062	122036	39297.4	66593.4	111223	33599	88108.9	46490.8	48979.5	198652	62646.1	154518	75902.8	41001.3	54560.1	65779.5	34350.1	56403	77938.9	197734	114440	79705	114189	87895.9	145419	142225	59936.6	37428.1	154795	131489	39605.9
P35858;Q2M5E4	34	28	275.025	Insulin-like growth factor-binding protein complex acid labile subunit	IGFALS	248835	527626	252602	383977	350573	466952	372751	248392	281759	186580	179131	226320	323737	319231	284895	92106.8	150464	248541	131990	271557	203736	197466	408825	197159	208697	181312	165734	198009	191858	95402.7	240772	202023	317510	202365	299639	260841	210871	331949	259598	279973	185171	234107	199262	178935
P08571	7	5	62.2423	Monocyte differentiation antigen CD14	CD14	19919.2	27480.9	13967.2	23602.1	28246.4	36932.7	17339.4	18393.6	17376.8	16006	14206.2	13901	18855.6	20006	24052.1	9739.07	15504.5	13679.5	9369.41	19871.7	12104.7	12346.3	22604.9	15743.5	15769.7	11619.2	16875.2	22648.3	19639.7	10768.3	14109.9	12963.2	28754	22910.2	20121.4	17379.9	13746.2	32907	19147	17614.1	9683.86	19771.4	18983.1	14895
P60709;P63261	39	19	295.742	Actin_ cytoplasmic 1	ACTB	226817	188186	133877	127012	85283.5	112202	141941	172265	83392.9	217410	329373	158152	131954	89377.8	86340.8	325013	79758.5	92128.8	238903	238325	217683	201648	49255.7	196894	61512.2	84972.2	157490	115915	114448	224083	128424	70588.1	54154.6	166114	117537	109346	135850	89632.5	95919.9	254677	101937	65875.4	134383	127491
Q05655	6	4	26.4857	Protein kinase C delta type	PRKCD	35264.6	24004.8	22119.4	25237	21941.1	27086.8	23763.8	19803.8	22171.4	22084.2	21343.8	19839.2	26259.8	17372.4	21366.8	10587.6	26055.9	21822.3	20922.3	19124.5	16998.9	18754.8	21084	22865.9	21564.2	18911.4	17366.2	12789.1	21928.3	16620	20087.8	22289.4	19430.9	18777.8	21838.3	20240.9	23336	20415	19809.2	20127.8	22211.2	15562.8	19190.7	26456.7
Q15293	5	3	27.821	Reticulocalbin-1	RCN1	24711.6	19909.6	21481.2	16547.1	20108.4	19045.2	18348.6	16472.4	19792.6	15421.7	34059.1	22628	24766	12924.1	18155.1	17741.6	10082.5	11099.5	16379.5	13015	22466.4	25098	14137.2	20924.1	13432.7	12021.3	21226.8	25727.2	11063.6	17480.8	11953.6	12339	12122.7	13964.8	18638.2	16197.5	8995.5	17117.6	12358.8	27351.1	17780.7	11631.8	15331.7	15413.9
P02745	6	5	33.7956	Complement C1q subcomponent subunit A	C1QA	45629.2	86531.5	49066.3	82461.6	68183.7	100900	66670.5	72180.6	74937.4	32653.3	61492.5	59436	79594.4	75253	80046	45245.8	78205	61323.9	43089.9	73076.6	58827.6	35453.3	82477.1	46108.2	81804.9	66866.6	47770.1	40121.1	62274.7	28142.8	53710.8	65168.8	65663	65709.9	71159.1	56969.3	73893.9	56341	50698.2	63112.4	36363.7	59105.3	67145	57455.8
O95568	8	3	32.4276	Histidine protein methyltransferase 1 homolog	METTL18	8354.94	11911.3	9395.82	10563.3	7826.99	7926.04	14863.7	11392	10954	7287.87	11489.7	10123.7	5881.96	5745.3	7859.49	4851.43	6274.2	5407.51	5936.52	4073.74	7182.48	7210.57	6517.23	5079.76	4827.15	5457.14	7426.2	6749.11	7889.29	3702.1	7531.25	8075.17	6545.67	4744.89	8714.66	4684.68	7211.8	5167.18	4132.86	10190.5	5046.13	3456.28	3697.17	6876.67
P23142	3	3	15.2214	Fibulin-1	FBLN1	5883.7	2754.36	2671.27	2719.7	2558.91	3199.45	3008.67	3407.65	2251.69	2298.42	1422.3	3569.53	2898.99	1759.43	2853.94	3940.39	3810.3	1998.93	4214.41	2093.76	2096.2	3077.76	2252.39	1463.17	1660.03	2432.21	3668.41	1908.46	1694.95	3216.11	3726.98	2822.39	1921.57	1780.17	2157.84	2691.22	1652.86	1566.47	2738.05	2140.04	2820.88	2114.95	1762.74	2078.9
P02750;Q12901;Q9GZR7;Q9H2Y7	55	43	389.616	Leucine-rich alpha-2-glycoprotein	LRG1	537326	579753	612451	529535	859444	803408	435982	450128	585896	517728	1.28535e+06	754915	998723	461263	607629	524874	219827	302127	384687	429066	848297	774073	574464	595456	461336	342806	703230	995452	345842	598487	318279	319274	473437	520875	672761	529652	234466	566730	432580	962321	342809	438765	610180	401012
P26927	7	7	39.392	Hepatocyte growth factor-like protein	MST1	16785.5	20764.4	13658.2	13309.4	16594.2	22941	18681	13819	13734.5	15266	13328.9	11673.9	23923	12976.7	16751.5	24849.5	11718.3	16179.4	19697.4	16709.8	12539.8	14358.7	17154.8	14497.8	16354.4	14069.8	9414.68	9832.26	16302.1	13537.5	12471	13271.5	15045.3	17236.1	13799.6	17755.6	15288.4	16648.9	11694.9	12714.3	11674.2	14522.3	14320.2	14332.8
P09871	54	47	387.69	Complement C1s subcomponent	C1S	374171	375806	264342	315694	311499	395544	286337	271786	290468	152808	238326	273697	352943	263642	294442	201296	255395	240718	211146	239538	222568	216691	295530	171772	281692	224964	175792	157114	253690	188385	235264	226817	278503	265374	312102	245195	251509	249430	256901	271508	164708	227369	230325	226136
Q13790	3	2	17.4501	Apolipoprotein F	APOF	19755	10130	21177.6	23455.9	24215.3	16452.8	42287.8	28836	28603.6	20409.3	22692.3	58548.4	12292.3	19947.5	22138.7	34975.2	16150.9	11225.3	19389	14214.2	22257.4	21822.3	14798.7	23815.5	9572.02	8024.5	15322.2	18681.8	12651.4	30398.9	13891.8	13364.6	18971.7	13349.3	28116.7	21843.8	20183.7	12820.7	10896.3	16684.7	24238.6	10084	11772.6	25206
A5A3E0;Q6S8J3;P0CG39;Q9BYX7;E7EQ34;O14653	52	14	289.676	POTE ankyrin domain family member F	POTEF	125335	109229	100359	103709	75697.5	67967.9	86020.9	105064	104449	104958	92067	81685	72147.9	51981.2	78013.5	50424.3	68347	49867.5	60865	81539.2	83353.1	79592.7	66800.7	71363.9	73175.5	56986.4	74256.4	54526.8	58923.5	65171.1	72104.1	75379.4	82558.1	96302.1	84077.2	74287.7	76091	68711.7	89393	93455.4	115370	57417.7	78744.3	65644.4
P13671	48	35	411.843	Complement component C6	C6	250850	341311	158720	275200	283953	320795	308622	173284	192220	196805	198433	186380	391844	322268	214056	112113	125842	194155	176302	204539	140902	163611	223775	192274	195527	185536	142935	147345	210387	144085	192910	147879	244175	208827	219648	237448	193885	261781	192683	161307	156090	245885	183485	196500
Q9ULV0	12	7	63.191	Unconventional my in-Vb	MYO5B	120801	125152	77154.3	117257	116607	159620	102369	79969	82489.8	77168.4	72061.3	77291.5	149830	123913	94083.8	73721.5	72354	74939.5	73220.7	68180.9	66010.4	61364.5	105047	75244.4	85790.4	56792.5	62974.9	65181	63119.6	75845.8	62843.2	79485.6	81809.1	90890.2	90998.5	86533	96309.6	104929	98642.8	84737.3	71628.3	83402.9	81959.2	78419.8
P29622	25	18	140.636	Kallistatin	SERPINA4	142554	296087	116231	242767	292179	406695	186546	133483	163972	173624	191493	122606	346818	267740	225358	168397	115271	221386	140385	245211	132406	136459	357663	190511	244221	137511	105623	117979	147120	99820.1	133371	172589	391948	250007	146655	234044	162956	289712	276314	163439	87040.7	293284	224007	113459
O14791	8	5	44.7163	Apolipoprotein L1	APOL1	123189	81717.2	69704.8	61464.7	53168.7	40442.4	93513.5	98172.6	94344.8	76742.9	86151	117684	26769.3	52982.4	59761.7	111032	58802.2	59626.1	98392.7	36458.6	77539.6	84191.3	37894.8	47903.7	39653	40267.1	77351.4	79553.5	64296.6	101158	82642.2	66027	32676.9	53290.8	83032.8	56868.6	79789.6	37217.5	31837	91465.4	89271.4	19944.4	37235.4	85369
Q08380	12	10	60.949	Galectin-3-binding protein	LGALS3BP	111575	70570.8	20953.1	35526	41204.3	30437.9	76066.5	66375	57424.4	20652.9	21355.3	46835.5	31512.4	44200.9	26572.9	45442.6	44626.6	39132.6	64560.2	33373.1	29147.5	44382	47122.5	25022.6	39757.2	27262.6	40300.7	29098.8	31797.3	44181.2	48813.1	31383.1	63641.8	32795.7	46703.9	50183.4	30735	28036.2	49870.5	24102.8	71224.7	27343.7	44293.6	88654
P04083	17	8	99.2797	Annexin A1	ANXA1	169106	243094	124842	185314	170038	243450	208535	155329	161199	140210	140306	127345	169560	151773	172339	100172	138032	145555	79408.4	108286	127187	104374	162132	114516	137647	125471	120351	109332	141262	111398	139944	145929	199450	151353	149861	165525	145971	193909	175374	167811	120784	137307	144568	123165
P00915	6	6	30.0513	Carbonic anhydrase 1	CA1	17538.3	45680.2	10474.5	40300.8	38773.2	49326.6	26784.9	12541.9	29725.7	20259.7	11015.1	16768.6	45442.1	44340.1	35000.5	14965	25050.1	24803.4	15649.4	22270.3	17520.1	15111.2	43158.8	25543.4	29250.4	22680.9	16529	16893.5	20674	12373.2	20853.1	29441.3	46425.9	35926.3	38010.9	32837.7	22020.2	38471.4	49986.9	19029.4	11050.9	38546.7	28813.2	15662.4
P07357	35	34	217.44	Complement component C8 alpha chain	C8A	361568	290931	199001	231267	263706	337275	229330	219531	220893	190388	176200	260089	288314	237611	213465	314369	163879	200446	225710	185508	151666	198296	241567	112537	180782	116118	153527	153003	179138	248462	159422	188545	218826	195280	227011	206033	178316	244247	220863	156159	151237	192285	181149	213470
Q14624	125	110	913.611	Inter-alpha-trypsin inhibitor heavy chain H4	ITIH4	2.23284e+06	2.74734e+06	1.63447e+06	2.7518e+06	2.61865e+06	3.80146e+06	2.54244e+06	1.7102e+06	1.99211e+06	1.93625e+06	1.30648e+06	2.07508e+06	2.79441e+06	2.81624e+06	2.35358e+06	1.66432e+06	1.35845e+06	1.84375e+06	1.50228e+06	1.81869e+06	1.78143e+06	1.45887e+06	2.85026e+06	1.89329e+06	2.09934e+06	1.59266e+06	1.67356e+06	1.81054e+06	1.99269e+06	1.91526e+06	1.67539e+06	1.92464e+06	2.35539e+06	2.77083e+06	2.49693e+06	2.26557e+06	1.7263e+06	3.19596e+06	1.89583e+06	1.63545e+06	1.4449e+06	2.54559e+06	2.2147e+06	1.79525e+06
P19827	113	98	741.163	Inter-alpha-trypsin inhibitor heavy chain H1	ITIH1	2.10466e+06	2.29891e+06	1.55793e+06	2.78887e+06	2.1027e+06	3.27997e+06	2.91303e+06	2.00597e+06	1.86408e+06	1.70915e+06	1.28249e+06	2.06925e+06	1.99497e+06	2.59395e+06	2.03638e+06	1.10126e+06	1.497e+06	1.68903e+06	1.38225e+06	1.64155e+06	1.662e+06	1.39948e+06	2.23161e+06	1.45961e+06	2.03478e+06	1.47523e+06	1.14737e+06	1.35421e+06	1.91099e+06	910445	1.66159e+06	1.49644e+06	2.2752e+06	1.62031e+06	2.05555e+06	1.71392e+06	2.15546e+06	2.34056e+06	1.49977e+06	1.43893e+06	1.20588e+06	1.8101e+06	1.63474e+06	1.79427e+06
P06681	39	5	355.305	Complement C2	C2	129104	185064	67176.4	197569	157577	182020	108157	90904	127862	109578	80616.2	142983	111219	107333	144334	61493.4	78667	84643.9	74317.1	105666	82926.9	105034	185658	83298.3	144436	100869	71709.5	80085.9	69098	68269	121650	110119	175477	126146	156366	133646	71195.4	171632	140285	137754	89455.8	143892	114279	57112.2
P02775	9	7	65.9642	Platelet basic protein	PPBP	117060	121038	87841.8	83250.6	85499.2	102867	82989.2	79320.3	74980.9	118003	126297	62639.7	76662.4	69322.3	70749.4	57433.3	71015.9	50694.6	63868.6	82935.9	79482.6	65468.5	73495.8	91209.4	36683.7	57090.6	63678.6	46764	54873.7	58134.2	77362.8	58906.3	54177.8	83659.7	68429.4	76616.9	85493.8	66672.3	70458.3	83168.4	84175.7	57889.5	102560	85686.1
P02747	8	7	49.4958	Complement C1q subcomponent subunit C	C1QC	51029.9	83144.9	39166.8	69040.9	50569.9	94982.9	55414.7	52173.7	50504.8	22317.7	53731.1	48294.5	98546.2	64219.6	78427.8	41004.7	56892.2	60325.5	33188.9	61672.3	42627	30620.8	82252.3	43648.6	79141	43779.4	32715.6	28856.5	44155.6	28609.5	42807.5	42976.4	62919.7	61657.3	58538.2	51269.8	51534	53549.6	46654.7	47446.3	21765.3	57692.3	56196.8	37273.9
P00736	67	52	495.073	Complement C1r subcomponent	C1R	670393	634622	422543	496638	501219	588086	431215	516564	460874	253814	390686	485195	563201	413150	443333	443074	355654	367578	475601	393759	420828	378936	477244	285574	445314	366129	300800	278753	385733	387517	397266	386552	421118	422915	474094	349451	367311	407179	422301	432856	279452	395648	386907	397952
P23508	5	3	27.9297	Colorectal mutant cancer protein	MCC	76979.1	69517.1	47866.7	62217.3	53510.9	65763.8	60424.6	44704.8	53066.3	46240.9	49900.6	69174.4	54211.5	45716.8	58071.4	35678.1	39416	40781.2	39743.7	33404.4	46767.1	50628.6	61424.8	32912.9	56012.5	37168	39188.2	43350.1	33852.1	46569.4	48493.1	49168.3	63188.7	46035.4	54206.8	52587.2	43810.2	53747.7	46299.5	56136.8	52459.3	53285.3	48301.1	41161
Q8IWZ5	13	7	74.0437	Tripartite motif-containing protein 42	TRIM42	27352.2	88958	33646.8	61839.2	62512	73703.3	50152.6	35946.2	42855.2	50481.4	64021.6	37325.9	69586.6	69638.7	65826.6	44744.6	30536.8	46225.3	57818	76665	41452.4	37578.3	66489	56284.3	54017.6	38305.6	36119.1	37264.8	38900.6	43451.3	33367.8	36886.9	72765.2	59111.6	43571.1	52053.1	50869	63917.9	50957.3	49316.1	20610.2	60040.5	48520.4	35197.8
Q9P2D0	4	2	23.1113	Inhibitor of Bruton tyr ine kinase	IBTK	94735	141422	71876	101999	102169	25647.1	122029	76626.7	102548	82305.4	102035	84394.4	91066.1	102933	115628	48764.3	67236.3	74331.7	45312.3	52518	58963.2	63018.3	92780.3	79442.7	61183.7	47912.7	60866.8	63426.7	64783.6	28336.6	47164.8	81639.5	84497.2	74951.5	71038.5	63048.7	81102.7	78771.4	81963.7	83147.4	57833.1	76061.2	62188	60529.4
P36955	32	21	245.681	Pigment epithelium-derived factor	SERPINF1	221882	334412	154373	273025	318285	408028	233736	139200	227184	160156	150731	170921	332993	277253	271468	125159	131038	228316	118395	220200	175531	147625	371039	217003	250466	165990	144158	164434	157399	88490.3	175093	189032	318171	243315	216580	281960	156265	293337	270132	201117	168580	247181	254808	142443
P08185	20	18	153.31	Cortic teroid-binding globulin	SERPINA6	81871	237745	99509.8	200412	228214	406322	97256.6	70203.8	121869	124984	148108	106127	242516	273385	230722	93363.7	74988.9	144174	71020.6	130007	92815.5	68685.8	199175	105102	190257	103819	79830.8	107393	89781.3	120055	103735	117172	252461	146983	90845.2	241644	99867.1	203164	172167	79595.8	83401.5	195839	165410	106662
Q06033	38	24	259.867	Inter-alpha-trypsin inhibitor heavy chain H3	ITIH3	188020	253602	143224	217850	141519	275827	202972	220672	172373	211842	230303	184163	179285	169747	217709	172754	118592	133945	209904	268104	127075	153031	166701	244669	124751	139962	134551	133266	160270	144429	133165	137424	111878	191011	179758	147059	151651	200023	102725	172138	123549	137897	134210	149329
P02748	69	61	514.937	Complement component C9	C9	697643	1.00047e+06	778079	760704	840865	1.24085e+06	800082	878897	719189	750395	888583	646767	941090	787553	785223	586333	455645	638001	487865	706585	668306	701109	705938	668106	689365	529482	531981	578700	645973	480388	453777	505342	515292	551686	761686	597692	623708	716266	463441	884873	358188	343065	650216	536807
P02765	93	76	435.283	Alpha-2-HS-glycoprotein	AHSG	3.5142e+06	2.34877e+06	2.36202e+06	2.54125e+06	2.12791e+06	3.26441e+06	2.62719e+06	1.78921e+06	2.19735e+06	1.46031e+06	1.38923e+06	2.06987e+06	2.51599e+06	2.2696e+06	2.09465e+06	1.2832e+06	2.03344e+06	2.24591e+06	1.41047e+06	1.50675e+06	1.2738e+06	1.57196e+06	2.67801e+06	1.14901e+06	2.17549e+06	1.38706e+06	1.37146e+06	845405	1.6298e+06	1.31876e+06	1.44881e+06	2.12515e+06	1.47719e+06	1.44378e+06	1.85245e+06	1.67502e+06	1.75517e+06	1.9009e+06	2.02756e+06	2.05411e+06	1.99446e+06	1.83944e+06	2.53136e+06	2.31449e+06
P07360	22	20	169.065	Complement component C8 gamma chain	C8G	248092	246417	125198	148218	160907	226300	186647	166675	180257	138198	145390	146491	184041	144575	140732	152470	161210	145866	151607	150458	122658	109581	189992	132603	103300	154003	89151.7	110501	139300	90686.1	120598	121515	150052	137976	177527	154695	149954	182951	146113	140267	121416	128035	125587	166213
P02774	188	163	1110.5	Vitamin D-binding protein	GC	4.61341e+06	7.28345e+06	3.31762e+06	5.16136e+06	5.00392e+06	7.57905e+06	5.22527e+06	4.17089e+06	3.64732e+06	4.09109e+06	3.24861e+06	4.26722e+06	5.74486e+06	4.71363e+06	4.63296e+06	3.35681e+06	3.66865e+06	3.93594e+06	3.06985e+06	3.05281e+06	3.00876e+06	3.05451e+06	4.9627e+06	3.10529e+06	3.70991e+06	2.87249e+06	2.66882e+06	3.01755e+06	3.35754e+06	2.84445e+06	3.68234e+06	3.37201e+06	4.7679e+06	3.8859e+06	4.15598e+06	4.07943e+06	3.60622e+06	4.42554e+06	3.81886e+06	3.40684e+06	2.49295e+06	3.60056e+06	3.61909e+06	3.61476e+06
Q92598	14	9	91.646	Heat shock protein 105 kDa	HSPH1	91434	141097	66050.4	121728	128219	188958	96542.3	65537.1	90143.5	86557.5	95946.5	61589.8	145695	145137	103354	140484	54444.1	127948	84159.1	161783	71212.7	83433.1	147433	100967	103016	91484.4	67314.9	67245.4	73581.7	71818.6	67823.8	91642.3	146741	111184	78141.5	134745	89160.1	132514	119874	85893.1	71283.9	123669	129752	62731.1
A0A075B6Z2	5	3	17.7898	T cell receptor alpha joining 56 (Fragment)	TRAJ56	252112	363463	268325	241370	222517	235502	255508	223072	200646	283154	336319	258499	199922	289016	261873	367134	217325	295325	201627	197458	287652	238574	168904	224443	215722	146031	242536	207297	149081	248261	143009	173150	137466	203961	215286	224123	287687	174618	186049	224134	176872	131210	93837.2	230406
P02790;P51687;Q00973;Q04917;Q5T013;Q9NXR7;Q9NZ08;Q9Y2H2;Q9Y2K5;V9GYY9	182	150	1010.98	Hemopexin	HPX	8.7498e+06	1.20334e+07	6.90593e+06	1.0201e+07	8.60381e+06	1.07786e+07	9.28191e+06	7.11358e+06	8.33068e+06	6.69189e+06	7.69481e+06	7.88088e+06	7.83376e+06	8.00886e+06	9.05342e+06	5.93723e+06	6.4562e+06	6.81405e+06	5.23084e+06	5.86415e+06	6.39978e+06	6.50235e+06	7.40793e+06	6.34287e+06	7.02752e+06	5.26631e+06	6.74983e+06	7.14581e+06	6.93504e+06	4.7957e+06	6.06639e+06	6.68003e+06	7.60082e+06	7.42958e+06	7.10485e+06	6.01524e+06	6.92255e+06	7.66259e+06	6.53252e+06	7.93431e+06	4.97518e+06	6.4039e+06	5.99401e+06	6.24066e+06
P17936	9	2	35.9615	Insulin-like growth factor-binding protein 3	IGFBP3	14371.9	14926.3	7727.59	11275.1	9568	17020.4	16441.7	10888.2	8135.49	10162.2	12305.1	9909.13	19769	11989.2	9042.9	5583.54	8097.66	13135.2	11648.6	11544.2	14461.6	11203	11849.8	9947.45	9016.54	7461.79	10353.4	7702.56	7540.86	18780.3	13438.6	7246.58	9347.8	8528.44	11533.6	12851.1	11888.3	10496.4	9376.01	11893.8	7722.94	7935.94	12684.7	10758.3
B4E1Z4;P00751	222	167	1424.3	cDNA FLJ55673_ highly similar to Complement factor B (EC 3.4.21.47)		3.64122e+06	6.73435e+06	3.2618e+06	3.53031e+06	3.9693e+06	5.80266e+06	3.63123e+06	4.60146e+06	3.88581e+06	2.98717e+06	2.6364e+06	3.16116e+06	4.20829e+06	3.7267e+06	3.34037e+06	3.44935e+06	2.21602e+06	3.47452e+06	3.38414e+06	2.89279e+06	3.37488e+06	3.04433e+06	4.10788e+06	2.71997e+06	3.2126e+06	2.23533e+06	2.40567e+06	2.91876e+06	3.12828e+06	3.85095e+06	2.96338e+06	2.34918e+06	3.72327e+06	3.19548e+06	4.4075e+06	2.92329e+06	2.93182e+06	3.6589e+06	3.08549e+06	3.59283e+06	1.68854e+06	2.63696e+06	2.91711e+06	2.84064e+06
P04004	93	77	458.105	Vitronectin	VTN	2.20591e+06	2.49598e+06	1.34946e+06	1.69938e+06	1.66202e+06	2.09651e+06	1.689e+06	1.24448e+06	1.41709e+06	1.39155e+06	1.46744e+06	1.6329e+06	1.55628e+06	1.51507e+06	1.33076e+06	1.50087e+06	1.26789e+06	1.65927e+06	1.52644e+06	920683	1.51954e+06	1.19305e+06	1.63498e+06	860521	1.47826e+06	1.19727e+06	970611	1.0736e+06	1.1926e+06	1.28764e+06	1.20384e+06	1.14119e+06	1.41382e+06	1.51617e+06	1.26853e+06	1.27697e+06	1.24712e+06	1.38727e+06	1.62767e+06	1.34708e+06	1.09033e+06	1.17589e+06	1.19018e+06	1.1738e+06
P02760	54	47	372.767	Protein AMBP	AMBP	1.50718e+06	1.09617e+06	743277	1.22978e+06	953474	1.49318e+06	1.19398e+06	940159	833766	837588	617711	1.17186e+06	995246	1.02818e+06	1.01328e+06	991858	835006	832974	906568	790935	815023	758453	909299	751004	968610	635957	675894	598545	870473	733732	854230	845673	1.01735e+06	909526	829785	945899	955494	1.06135e+06	850834	626731	720846	908145	774469	859887
Q9UGM5	10	10	65.4722	Fetuin-B	FETUB	34143	33180.2	26242.4	29714.6	23855	36451.3	42518.2	36696.5	30495	19231.4	17919.5	29582.3	15997	24015.1	33706.7	24492.9	27162.6	29342.7	24522.5	23063.3	20240.8	20231.3	25745.1	24541	27275.1	28012.1	24772.3	17200.9	24185.4	18777.9	23004.6	21735	23221.7	23497.5	19662.3	22260.2	25744.7	27914.8	22044.8	27988.8	22275.4	20124.4	19545.3	26540.2
Q5TB30;Q13884	7	5	33.057	DEP domain-containing protein 1A	DEPDC1	87281.4	99180.2	80170	101215	103199	117925	86631.7	50086.2	70876.8	66625.1	35402.5	66328.7	87849.9	67667.6	80487.8	31388.8	55530.1	61016.6	59906.7	113484	59425	57568.5	86729.3	97205.6	46214.8	45231.1	52295.1	39352.5	54833.9	51784.7	84343.3	56867.5	46006	89001.5	74006.3	59877.7	80937.5	79124.4	55768.2	108923	56682	85753.9	100119	74147.8
P51884	32	24	259.583	Lumican	LUM	441145	355690	235148	392154	304371	324854	252079	189318	251530	164405	223778	227452	274827	241009	390432	366063	248641	190414	215527	174227	179785	167235	287569	139138	184776	170079	307836	172519	211623	138044	229064	327055	301317	192971	244238	286508	200272	261180	269903	158680	193050	208532	184223	199170
P02749	94	87	516.177	Beta-2-glycoprotein 1	APOH	2.81775e+06	2.84523e+06	1.60825e+06	3.66106e+06	1.43091e+06	3.4808e+06	2.49113e+06	1.58038e+06	1.90332e+06	1.7552e+06	1.91903e+06	2.00611e+06	2.76213e+06	2.06367e+06	2.16144e+06	1.95014e+06	1.60986e+06	2.06553e+06	1.71359e+06	1.05244e+06	1.82176e+06	1.87686e+06	2.5605e+06	1.99569e+06	2.3632e+06	1.88834e+06	1.77347e+06	1.54927e+06	2.19204e+06	1.54024e+06	2.12005e+06	2.42746e+06	2.61377e+06	2.48079e+06	2.60464e+06	2.78346e+06	1.06998e+06	2.48502e+06	2.96602e+06	2.15953e+06	1.57529e+06	2.68576e+06	2.5212e+06	1.84627e+06
P02741	4	3	22.7236	C-reactive protein	CRP	17084.4	45412.8	19586.2	22627.5	24650.7	29909.8	25888.9	18667.7	17657.3	18686.6	19713.1	20534.6	30889.5	27718.7	23588.4	19846.3	12295.9	22127.3	15810.1	14308.2	28567.2	19221	25457.3	17479	25809.1	16293.8	18187.2	33795.6	18774.8	23985.1	16105.7	15822	22470.5	23777	18841.1	25613.3	15904.9	20216.9	19324.3	19398.8	15704.6	22272.3	20383.9	20459.7
O95445	13	12	64.0009	Apolipoprotein M	APOM	78712.9	69046.9	56579	55897.6	64485.4	74362.3	65095.2	58739	56138.4	54432.4	57023.1	62369.3	71374	56038.7	54034	45635.5	45152.8	45682.1	53872.2	43818.4	40107.8	42733.4	71871.1	55136.2	37826.1	37744	40187.4	35618.5	35760.8	45000.1	50888.2	42972.5	78475	55869.5	54338.7	66548.6	64767.7	53483.5	67629.2	61527.2	72022.4	61818.7	64923.3	58593.8
Q9NZP8	9	5	72.5204	Complement C1r subcomponent-like protein	C1RL	46792.5	49249.1	33731	31733	24399.5	31158.3	35473.9	28226.3	28148.4	29608.7	34850.1	34408.3	30846.3	25024	24641.7	37157.8	23412.8	23344.8	31320.6	25478.3	40240	42549.8	43337.5	32262	33269.2	47433.7	26893	36575.9	24355.5	31318.2	25747.9	26890.7	25036.1	24284.1	31919.9	27960	27082.2	33483.9	24175.4	54232.4	31572	24186.7	22710.6	27650.3
P07358	47	36	293.028	Complement component C8 beta chain	C8B	316604	410694	269078	291420	295373	358091	340215	289253	308317	252776	330013	257865	300558	278813	307314	422448	217387	238089	379156	242437	252996	221519	310196	184194	195520	175557	217040	252294	238782	193544	191190	177448	249495	210400	295456	250462	265752	274830	228990	232689	174640	183570	179948	281429
Q96PD5	43	39	344.303	N-acetylmuramoyl-L-alanine amidase	PGLYRP2	572341	604648	341984	702966	539703	778179	711377	385853	523135	387335	353431	527582	566598	525948	496724	616461	396882	405642	461796	353154	436582	402806	430114	373110	454465	340708	290968	280219	355382	275988	360068	397271	549296	417570	398355	564871	444609	533696	428751	409628	362203	390477	391569	407477
P04217	120	105	643.864	Alpha-1B-glycoprotein	A1BG	4.53229e+06	3.94875e+06	3.11884e+06	3.60047e+06	3.50205e+06	4.50032e+06	4.06256e+06	2.86809e+06	2.87417e+06	3.30252e+06	1.95022e+06	3.97849e+06	3.47916e+06	3.60128e+06	3.11876e+06	4.92625e+06	2.24636e+06	2.87443e+06	4.20681e+06	2.62387e+06	3.40381e+06	3.5251e+06	3.09343e+06	2.74865e+06	3.37588e+06	2.09061e+06	3.34052e+06	3.20586e+06	3.00008e+06	4.56193e+06	2.97571e+06	2.96102e+06	3.15319e+06	3.33305e+06	3.31753e+06	3.6257e+06	3.01054e+06	4.03925e+06	3.0407e+06	2.64723e+06	3.35608e+06	2.97423e+06	2.73131e+06	3.28542e+06
[truncated: 39 more columns]
